# Supplementary material for: Genetic Diversity Analysis and Core Germplasm Construction of Rubus chingii Hu
Source: Plants (Basel). 2024 Feb 23;13(5):618. doi: 10.3390/plants13050618 (PMC10934504; doi:10.3390/plants13050618)
Supplement: Supplementary file 1 [file plants-13-00618-s001.zip]

Archive with 11 entries (11 files):
- supplementary Figures-all.pdf
- Table S1 Statistics of data quality control results.xlsx
- Table S10  Basic Population Genetic Parameters.xlsx
- Table S2  Mean sequencing depth and coverage of individuals.xlsx
- Table S3 Number and frequency of alleles within R. chingii wild populations.xlsx
- Table S4 SNPs and InDels count ,distribution frequency and mean depth of each chromosome.xlsx
- Table S5 Specific variation statistics for each sample.xlsx
- Table S6 The specific number and proportion of SNPs and InDels annotations.xlsx
- Table S7 Value of the fixation index (Fst).xlsx
- Table S8 Coreset coverage.xlsx
- Table S9 Population imformation.xlsx
