# Supplementary material for: Genetic Diversity Analysis and Core Germplasm Construction of Rubus chingii Hu
Source: Plants (Basel). 2024 Feb 23;13(5):618. doi: 10.3390/plants13050618 (PMC10934504; doi:10.3390/plants13050618)
Supplement: Supplementary file 1 [file plants-13-00618-s001.zip › Table S1 Statistics of data quality control results.xlsx]

## Sheet: qc_stat
Table S1. Statistics of data quality control results
sample--new	Raw reads	Raw bases	Clean reads	Clean bases	Q20_ratio	Q30_ratio	CG content	reads passed filters
9-9	2903422	415603788	2851988	404790918	0.95825	0.89127	0.39359	2851988
9-8	4594842	657991824	4556416	650079847	0.96133	0.89639	0.37479	4556416
9-7	3478166	498310102	3402662	484630199	0.9542	0.88429	0.38783	3402662
9-6	2829464	405139909	2775942	394155849	0.95752	0.89047	0.39326	2775942
9-5	4416392	632557210	4354642	620769025	0.95763	0.88989	0.3837	4354642
9-4	3192756	457156650	3132326	445307818	0.95792	0.89104	0.3888	3132326
9-3	4693658	672082529	4632064	659062345	0.95869	0.89238	0.38848	4632064
9-2	4841420	693104002	4802254	684293329	0.96037	0.89418	0.38488	4802254
9-16	3762774	539016213	3726022	529410810	0.95958	0.89307	0.38444	3726022
9-15	2287302	327806633	2263842	322780587	0.96025	0.89465	0.39237	2263842
9-14	5113996	731914305	5061470	720949991	0.95852	0.89162	0.4144	5061470
9-13	5439810	779233629	4447366	558171015	0.96848	0.91503	0.42871	4447366
9-12	4085332	585016019	4018142	572906921	0.95607	0.88725	0.40901	4018142
9-11	2490844	356862064	2461688	349519264	0.95915	0.89324	0.39862	2461688
9-10	3070688	439936130	3037908	432425530	0.95965	0.89371	0.3991	3037908
9-1	4006534	573694954	3950464	561409598	0.95799	0.89082	0.38826	3950464
49-6	3253958	465758891	3235466	461200859	0.97958	0.93649	0.39467	3235466
49-5	3476078	497693143	3374038	480301025	0.9707	0.91928	0.41604	3374038
49-4	3234036	463035937	3098158	440968097	0.9681	0.91495	0.40293	3098158
49-3	3191718	457065743	3152100	448772146	0.97815	0.93456	0.41808	3152100
49-2	3801908	544151196	3775774	537716604	0.97835	0.93432	0.40264	3775774
49-1	3269810	468219826	3242100	462815635	0.97875	0.93509	0.40643	3242100
37-9	3820324	547012396	3791366	540218307	0.97843	0.93414	0.40924	3791366
37-8	3138328	449460484	3119828	445267966	0.97849	0.93366	0.39827	3119828
37-7	3762220	538634284	3739924	533614759	0.97966	0.9365	0.40837	3739924
37-6	2478596	355018617	2454962	349115280	0.97825	0.93424	0.41614	2454962
37-5	4610276	659778375	4578772	651946635	0.97955	0.9374	0.40706	4578772
37-4	3259812	466603041	3203428	455775610	0.97636	0.93064	0.40416	3203428
37-3	4133058	591659198	4110546	586463249	0.9796	0.93619	0.40311	4110546
37-2	3110194	445115656	3095546	441159410	0.98091	0.93951	0.42229	3095546
37-10	3244988	464446374	3218152	457139141	0.97866	0.93501	0.41433	3218152
37-1	3358478	480862081	3301964	470581004	0.97564	0.92888	0.40494	3301964
30-5	3995616	572112466	3953590	563220966	0.97809	0.93324	0.38885	3953590
30-4	2560792	366498014	2546116	362994067	0.9805	0.93852	0.39803	2546116
30-3	3196224	457439098	3135862	445041167	0.97599	0.93114	0.42177	3135862
30-2	3798126	543601496	3774326	538030214	0.97956	0.9367	0.40086	3774326
30-1	3655484	523382575	3633466	517970716	0.97951	0.93653	0.40287	3633466
18-1	8037368	1150891854	7579246	983679228	0.97416	0.92731	0.4303	7579246
17-4	2428862	347734739	2408648	342523830	0.97813	0.9342	0.41928	2408648
17-3	2610274	373694664	2592920	369594883	0.97808	0.93355	0.40271	2592920
17-2	11660704	1669030555	10839044	1428555767	0.9716	0.92221	0.44758	10839044
17-1	3701798	529900666	3676156	524112976	0.97906	0.93562	0.40395	3676156
16-9	3005972	430336602	2978476	423196808	0.97828	0.93446	0.40915	2978476
16-8	3221788	461383574	3198514	455332868	0.97781	0.93307	0.40872	3198514
16-7	2712640	388391849	2686918	381890766	0.9775	0.9329	0.41698	2686918
16-6	3150070	450982375	3125302	445105798	0.97846	0.93411	0.40473	3125302
16-5	3395496	486050779	3373588	480256345	0.97937	0.9365	0.40426	3373588
16-4	6624430	948456037	6417272	875549445	0.97322	0.92393	0.41248	6417272
16-3	2845310	407533227	2797094	398739041	0.97448	0.92674	0.40742	2797094
16-23	4293074	614473362	4267266	608367165	0.9798	0.93757	0.41225	4267266
16-22	4383028	627200976	4358928	621743839	0.98082	0.9395	0.40678	4358928
16-21	4257088	609414598	4236906	605295425	0.98162	0.94144	0.40359	4236906
16-20	3734740	534783433	3697714	526723598	0.97754	0.93263	0.41986	3697714
16-2	2522450	361259746	2490774	354675772	0.97809	0.93442	0.41042	2490774
16-19	4279188	612517509	4254060	606712938	0.97984	0.93744	0.40667	4254060
16-18	5022396	718865935	4993578	712611065	0.98119	0.94089	0.42148	4993578
16-17	3508500	502273551	3475522	495393564	0.97917	0.93633	0.40558	3475522
16-16	3406544	487738545	3375034	480016487	0.97866	0.93564	0.40916	3375034
16-15	4731294	677202797	4703750	671151915	0.97939	0.9357	0.399	4703750
16-14	3416582	489142070	3386414	481303883	0.97791	0.93371	0.40791	3386414
16-13	3936836	563723299	3910384	557158853	0.97731	0.93094	0.39285	3910384
16-12	4744424	679169935	4716634	673629978	0.98044	0.93855	0.40716	4716634
16-11	3169888	453893411	3148210	448800577	0.97853	0.93417	0.39826	3148210
16-10	5726678	819882245	5546716	755435893	0.97275	0.92322	0.43021	5546716
16-1	3002762	429999614	2980448	424223589	0.97811	0.93333	0.41392	2980448
15-3	6327242	906380324	6086534	835588786	0.97147	0.92057	0.40784	6086534
15-2	3255894	466143623	3232218	459690115	0.97823	0.93365	0.40644	3232218
15-1	3393554	485837819	3370816	479754186	0.97914	0.9357	0.40125	3370816
14-9	3640676	521096789	3608258	514063334	0.96054	0.89481	0.39866	3608258
14-8	4152028	594449912	4109768	585847506	0.95948	0.89349	0.41157	4109768
14-7	5086972	728007708	5040190	718089234	0.95988	0.89343	0.39018	5040190
14-6	4829410	691282031	4767912	679318184	0.95875	0.89216	0.40827	4767912
14-5	3191822	456890322	3156052	447964461	0.95837	0.89131	0.41211	3156052
14-4	2844056	407419557	2817368	400631150	0.96041	0.89447	0.40695	2817368
14-38	3597368	514981651	3551162	505434846	0.97686	0.93156	0.40914	3551162
14-37	2783716	398687085	2750550	391302841	0.97713	0.93183	0.40275	2750550
14-36	3487780	499280708	3464796	493364653	0.9793	0.93644	0.40646	3464796
14-35	3561368	509795384	3538338	503529175	0.97873	0.93451	0.40109	3538338
14-34	3804010	545190112	3780860	540033423	0.97945	0.93614	0.39981	3780860
14-33	4659724	667039742	4631596	659711989	0.97973	0.93649	0.40808	4631596
14-32	3475588	497711138	3451708	492055586	0.97909	0.93549	0.39112	3451708
14-31	3968856	568066564	3936406	559627317	0.97774	0.93339	0.41514	3936406
14-30	4216988	603764886	4176882	595020991	0.97788	0.93401	0.40869	4176882
14-3	2931484	419624607	2891162	410879872	0.95939	0.89268	0.40245	2891162
14-29	3187430	456441617	3156910	449116625	0.97768	0.93283	0.41124	3156910
14-28	2566570	367607138	2544190	361513754	0.9778	0.9334	0.41264	2544190
14-27	3715956	531995957	3680488	524393685	0.97894	0.9356	0.41105	3680488
14-26	3822718	547182163	3789610	539362441	0.97746	0.93219	0.40623	3789610
14-25	2383048	341412469	2349088	334837793	0.97626	0.92983	0.41174	2349088
14-24	3623488	518754567	3575058	508178159	0.95812	0.89103	0.41486	3575058
14-23	5030352	720027128	4981338	709984318	0.96067	0.89483	0.3998	4981338
14-22	3503062	501713233	3376802	480670044	0.95247	0.88196	0.42382	3376802
14-21	2374292	340297287	2265194	321375986	0.951	0.88033	0.42878	2265194
14-20	4299504	615602919	4269728	608958363	0.9624	0.89754	0.41737	4269728
14-2	4173086	597361969	4131224	587926390	0.96003	0.89436	0.40456	4131224
14-19	3332444	477154494	3289168	468446393	0.95966	0.89398	0.40271	3289168
14-18	2664986	381784068	2636228	375695510	0.96059	0.89558	0.40673	2636228
14-17	4176234	598086824	4144536	591847291	0.96072	0.89517	0.40708	4144536
14-16	5487148	785350260	5428192	773952411	0.95868	0.89139	0.39871	5428192
14-15	4134558	591989423	4090212	582804200	0.95934	0.89322	0.40431	4090212
14-14	4160526	595697036	4103184	584303009	0.95698	0.88922	0.40341	4103184
14-13	3741854	535754141	3709876	528290967	0.96145	0.89643	0.40366	3709876
14-12	4780976	684341207	4633160	661119358	0.95001	0.87774	0.40849	4633160
14-11	2775506	397228215	2682486	381266613	0.95306	0.88329	0.42093	2682486
14-10	2815296	403214750	2734348	388929997	0.95349	0.88377	0.42242	2734348
14-1	3735008	534937059	3696568	526513149	0.95953	0.89283	0.39752	3696568
13-9	3677608	526628686	3647592	520123972	0.96109	0.8962	0.4161	3647592
13-8	4149356	593975849	4120576	587538478	0.96229	0.89771	0.39566	4120576
13-7	3494898	500739259	3436926	488737012	0.9577	0.89056	0.41646	3436926
13-6	3693226	528833592	3605106	513398883	0.95525	0.8864	0.40697	3605106
13-5	2882546	413048007	2835956	402610583	0.95844	0.89244	0.41837	2835956
13-4	4091600	585722852	4053234	576123092	0.9604	0.89523	0.40689	4053234
13-3	5809522	832299640	5438332	705780021	0.96862	0.91441	0.42324	5438332
13-2	4338638	621410232	4280310	608237869	0.95876	0.89227	0.41155	4280310
13-14	3496398	500681928	3454582	490568559	0.95906	0.89251	0.40599	3454582
13-13	3343626	478822466	3306668	469814006	0.95983	0.89357	0.40476	3306668
13-12	4035188	577769881	4005148	571139675	0.96152	0.89625	0.39166	4005148
13-11	3561384	509861888	3508212	500284108	0.9563	0.88791	0.41271	3508212
13-10	3513636	503331697	3481756	496341706	0.96092	0.89582	0.40361	3481756
13-1	2194456	314396980	2168726	307905460	0.95921	0.89293	0.41013	2168726
10-9	5566188	796694569	5509536	783189602	0.96095	0.89668	0.40834	5509536
10-8	3003366	429924254	2945744	417995086	0.95871	0.8925	0.40008	2945744
10-7	4005054	573402395	3973718	565924470	0.96096	0.89559	0.39433	3973718
10-6	4167102	596505842	4135028	588335768	0.9611	0.89511	0.39275	4135028
10-5	4265492	610620408	4081046	580739667	0.94617	0.87149	0.40896	4081046
10-4	3992850	571557436	3905708	556730793	0.95396	0.88406	0.41742	3905708
10-3	3939468	564009861	3910274	557750195	0.96036	0.89418	0.38861	3910274
10-2	2636844	377453691	2498966	353932489	0.94919	0.87744	0.41999	2498966
10-12	2614976	374634658	2589992	368798194	0.96002	0.894	0.4057	2589992
10-11	2965348	424650534	2938168	417749175	0.9614	0.89683	0.41123	2938168
10-10	3720220	532813168	3674702	522747662	0.95866	0.892	0.41898	3674702
10-1	3904282	558857262	3869692	550325363	0.961	0.89626	0.40028	3869692
mean	3.80184e+06	5.44342e+08	3.73661e+06	5.28613e+08	0.968254	0.912768	0.406521
total	501843458	71853133720	493232058	69776974192
