# Supplementary material for: Genetic Diversity Analysis and Core Germplasm Construction of Rubus chingii Hu
Source: Plants (Basel). 2024 Feb 23;13(5):618. doi: 10.3390/plants13050618 (PMC10934504; doi:10.3390/plants13050618)
Supplement: Supplementary file 1 [file plants-13-00618-s001.zip › Table S2 Mean sequencing depth and coverage of individuals.xlsx]

## Sheet: Sheet1
Table S2. Mean sequencing depth and coverage of individuals
Sample	total Reads	mapped Reads	mapped rate	depth	coverage 1X	coverage 5X	coverage 10X	coverage 15X	coverage 20X	coverage 30X
30-4	2546116	2328719	0.9146	1.27	0.02729	0.00965	0.00586	0.00436	0.00355	0.00264
10-11	2938168	2807245	0.9554	1.533	0.04827	0.01724	0.01057	0.00794	0.00643	0.00479
9-9	2851988	2662993	0.9337	1.419	0.04629	0.02038	0.01307	0.00976	0.00787	0.00572
14-1	3696568	3444028	0.9317	1.818	0.05471	0.01967	0.012	0.00894	0.00725	0.00533
9-6	2775942	2599561	0.9365	1.367	0.05275	0.02039	0.01256	0.00934	0.00754	0.00549
37-1	3301964	3132812	0.9488	1.585	0.0392	0.01335	0.00824	0.00617	0.00505	0.00381
13-1	2168726	2049009	0.9448	1.127	0.02684	0.01349	0.00952	0.0075	0.00627	0.00474
9-11	2461688	2275232	0.9243	1.236	0.03183	0.01562	0.01103	0.00872	0.00722	0.0054
14-2	4131224	3685104	0.892	1.976	0.05832	0.02307	0.01419	0.01048	0.00841	0.00617
9-3	4632064	4335936	0.9361	2.207	0.06705	0.02962	0.01895	0.01424	0.01158	0.00856
49-5	3374038	3143653	0.9317	1.668	0.0587	0.02031	0.01227	0.00909	0.00734	0.00536
14-10	2734348	2496957	0.9132	1.277	0.04923	0.01665	0.01017	0.00768	0.00617	0.00455
10-6	4135028	4022217	0.9727	2.233	0.05203	0.01861	0.01156	0.00882	0.00722	0.0054
10-1	3869692	3434327	0.8875	1.87	0.05933	0.02173	0.01333	0.00994	0.00804	0.00592
13-14	3454582	3225258	0.9336	1.671	0.05293	0.01708	0.01066	0.00808	0.00659	0.00493
16-12	4716634	4245511	0.9001	2.263	0.04624	0.01456	0.00893	0.00678	0.00555	0.00411
49-4	3098158	2871428	0.9268	1.428	0.05716	0.01897	0.01134	0.00834	0.00669	0.00484
37-4	3203428	2993147	0.9344	1.623	0.0585	0.02031	0.01225	0.00915	0.00739	0.00542
49-2	3775774	3422360	0.9064	1.861	0.05773	0.0186	0.01106	0.00819	0.00665	0.00487
30-1	3633466	3399855	0.9357	1.873	0.03456	0.01142	0.00695	0.00522	0.00425	0.00321
14-29	3156910	2973691	0.942	1.589	0.04635	0.015	0.00912	0.00693	0.00561	0.00423
9-15	2263842	2055015	0.9078	1.114	0.02454	0.01279	0.00941	0.00765	0.00647	0.00506
49-6	3235466	2864583	0.8854	1.567	0.05342	0.01664	0.00955	0.00691	0.00548	0.00398
16-8	3198514	3055471	0.9553	1.688	0.05386	0.01711	0.01027	0.00767	0.00626	0.00469
13-11	3508212	3297799	0.94	1.749	0.06033	0.01948	0.01199	0.00908	0.00746	0.00555
16-23	4267266	3894351	0.9126	2.114	0.04401	0.01517	0.00913	0.00685	0.00553	0.0041
14-24	3575058	3321809	0.9292	1.752	0.05338	0.01705	0.0105	0.00798	0.00651	0.00486
16-7	2686918	2414073	0.8985	1.288	0.04777	0.0155	0.00926	0.00686	0.00557	0.0041
14-11	2682486	2393959	0.8924	1.211	0.04572	0.01589	0.00966	0.00725	0.00586	0.00432
16-11	3148210	2913344	0.9254	1.604	0.04901	0.01735	0.01021	0.00761	0.00615	0.0045
18-1	7579246	6897547	0.9101	3.263	0.06404	0.02765	0.01813	0.01387	0.01154	0.00878
9-12	4018142	3889174	0.9679	2.023	0.04671	0.01547	0.0099	0.00761	0.00631	0.00484
14-33	4631596	4032081	0.8706	2.032	0.05483	0.0181	0.0109	0.00812	0.00655	0.00489
16-13	3910384	3605998	0.9222	1.812	0.05637	0.01771	0.01052	0.00781	0.00634	0.00473
17-3	2592920	2447814	0.944	1.335	0.03873	0.01401	0.00839	0.0062	0.005	0.00362
9-16	3726022	3469981	0.9313	1.901	0.05446	0.02263	0.014	0.01033	0.00827	0.00601
15-3	6086534	5621416	0.9236	2.859	0.06143	0.03082	0.02135	0.0166	0.01383	0.01049
16-20	3697714	3019628	0.8166	1.639	0.04006	0.01351	0.00826	0.00625	0.00515	0.00382
10-10	3674702	3286873	0.8945	1.816	0.04521	0.01461	0.00924	0.00711	0.0059	0.00448
37-7	3739924	3448342	0.922	1.839	0.05285	0.01672	0.01012	0.00752	0.00609	0.00449
10-5	4081046	3953677	0.9688	2.016	0.05478	0.01902	0.01196	0.00907	0.00744	0.00558
37-3	4110546	3640614	0.8857	1.935	0.04804	0.01543	0.00929	0.0069	0.00565	0.00418
14-25	2349088	2076777	0.8841	1.088	0.03626	0.01416	0.00853	0.00628	0.00503	0.00362
14-14	4103184	3654515	0.8907	1.957	0.08098	0.02728	0.01649	0.01217	0.00977	0.00712
14-12	4633160	4418487	0.9537	2.246	0.05423	0.01738	0.01088	0.00823	0.00672	0.00497
9-1	3950464	3780053	0.9569	2.018	0.06615	0.02841	0.01784	0.01336	0.01076	0.00787
37-10	3218152	2996236	0.931	1.608	0.05301	0.01747	0.01064	0.00792	0.00641	0.00475
16-17	3475522	3223637	0.9275	1.74	0.04959	0.01705	0.01026	0.00758	0.00609	0.00445
15-1	3370816	3099844	0.9196	1.69	0.06423	0.02041	0.01203	0.00884	0.00704	0.0051
13-9	3647592	3006770	0.8243	1.594	0.03466	0.01623	0.01104	0.00855	0.00702	0.00519
14-32	3451708	3256378	0.9434	1.808	0.05872	0.01923	0.01125	0.00826	0.00657	0.00478
13-12	4005148	3441823	0.8593	1.674	0.05065	0.01619	0.00977	0.00722	0.00585	0.00433
14-19	3289168	2980731	0.9062	1.535	0.04627	0.02011	0.01285	0.00962	0.00777	0.00558
9-7	3402662	3255554	0.9568	1.747	0.06524	0.02579	0.01579	0.0117	0.00935	0.00681
49-3	3152100	2827176	0.8969	1.541	0.03634	0.01232	0.00771	0.00581	0.00479	0.00361
37-5	4578772	4211804	0.9199	2.292	0.05777	0.01906	0.01168	0.00879	0.00714	0.00535
13-8	4120576	3741088	0.9079	2.058	0.04125	0.01917	0.01267	0.00958	0.00778	0.0057
17-4	2408648	2229298	0.9255	1.194	0.02965	0.01134	0.00688	0.00513	0.00415	0.00308
9-14	5061470	4815011	0.9513	2.618	0.05795	0.0184	0.01147	0.00868	0.00711	0.00536
37-9	3791366	3541216	0.934	1.962	0.04424	0.01544	0.00942	0.00707	0.00576	0.00436
14-4	2817368	2656459	0.9429	1.42	0.04983	0.01698	0.01034	0.00768	0.00629	0.00465
14-35	3538338	3304378	0.9339	1.695	0.04796	0.01909	0.01152	0.00853	0.00685	0.00506
13-7	3436926	3266907	0.9505	1.79	0.04227	0.02036	0.01372	0.01062	0.00872	0.00656
14-30	4176882	3936432	0.9424	2.147	0.06438	0.02158	0.0132	0.00992	0.00802	0.00588
14-8	4109768	3816748	0.9287	2.056	0.06128	0.02048	0.01267	0.00955	0.00783	0.00584
13-5	2835956	2672265	0.9423	1.421	0.04994	0.02009	0.01261	0.00947	0.00772	0.00565
16-2	2490774	2269093	0.911	1.218	0.04099	0.01693	0.0104	0.00769	0.00616	0.00442
13-4	4053234	3694031	0.9114	2.012	0.0562	0.02292	0.01443	0.0108	0.00872	0.00645
10-4	3905708	3644563	0.9331	1.912	0.04636	0.01519	0.00958	0.0073	0.00603	0.00457
30-3	3135862	2831225	0.9029	1.496	0.03806	0.01328	0.00834	0.00639	0.0053	0.00404
14-37	2750550	2596716	0.9441	1.412	0.05743	0.01936	0.0115	0.0084	0.00672	0.00487
14-18	2636228	2410676	0.9144	1.295	0.03249	0.01622	0.01108	0.00855	0.00699	0.00513
9-8	4556416	4244183	0.9315	2.312	0.05442	0.02041	0.01237	0.00911	0.00735	0.00537
14-15	4090212	3677104	0.899	1.914	0.06453	0.02078	0.01276	0.00962	0.00787	0.00586
16-18	4993578	4654117	0.932	2.56	0.03225	0.01053	0.00661	0.00509	0.00422	0.00322
13-10	3481756	3223885	0.9259	1.756	0.04166	0.01915	0.01257	0.0096	0.00779	0.00574
16-14	3386414	3098007	0.9148	1.665	0.06833	0.02412	0.01446	0.01067	0.00859	0.00628
10-12	2589992	2441641	0.9427	1.321	0.04835	0.01775	0.0108	0.00804	0.00649	0.00482
30-2	3774326	3410718	0.9037	1.84	0.04304	0.01392	0.00853	0.00641	0.00518	0.00384
16-5	3373588	3035568	0.8998	1.638	0.06343	0.02082	0.01215	0.00895	0.00719	0.00524
16-10	5546716	5163191	0.9309	2.497	0.06396	0.02245	0.01428	0.011	0.00909	0.00691
16-3	2797094	2589428	0.9258	1.294	0.04837	0.01589	0.00952	0.00702	0.00569	0.00418
14-27	3680488	3461212	0.9404	1.804	0.03685	0.01226	0.00765	0.00583	0.00479	0.00363
16-1	2980448	2838447	0.9524	1.542	0.04919	0.01679	0.01019	0.00757	0.00618	0.00458
14-6	4767912	4086948	0.8572	2.143	0.06602	0.02367	0.01459	0.01094	0.00895	0.00667
37-8	3119828	2939619	0.9422	1.568	0.04239	0.01339	0.00814	0.00605	0.00491	0.00365
14-7	5040190	4688689	0.9303	2.247	0.05117	0.01805	0.01098	0.00816	0.00658	0.00486
14-5	3156052	2872047	0.91	1.551	0.05683	0.01906	0.01153	0.00859	0.00698	0.00509
16-4	6417272	6055532	0.9436	3.11	0.0767	0.02813	0.01811	0.01388	0.01146	0.0087
16-9	2978476	2853123	0.9579	1.545	0.04692	0.01765	0.01061	0.00784	0.00631	0.00467
14-21	2265194	2070165	0.9139	1.028	0.03835	0.0138	0.00862	0.00648	0.00526	0.00392
10-2	2498966	2296070	0.9188	1.167	0.0447	0.01712	0.0106	0.00796	0.00645	0.00472
17-1	3676156	3503787	0.9531	1.897	0.04352	0.01467	0.00913	0.0069	0.00562	0.00422
14-38	3551162	3299327	0.9291	1.758	0.0562	0.02013	0.01224	0.00915	0.00736	0.00543
14-36	3464796	3090719	0.892	1.611	0.05162	0.0167	0.00997	0.00737	0.00595	0.0044
13-2	4280310	4081362	0.9535	2.246	0.03052	0.01576	0.01186	0.00979	0.00848	0.00677
37-6	2454962	2214592	0.9021	1.209	0.04807	0.01531	0.00927	0.00685	0.00551	0.00405
15-2	3232218	2929425	0.9063	1.579	0.06373	0.02059	0.01221	0.00899	0.00725	0.00525
13-13	3306668	3086396	0.9334	1.686	0.06419	0.02393	0.0147	0.01098	0.0089	0.00657
14-20	4269728	3709914	0.8689	1.827	0.04779	0.01678	0.01019	0.00758	0.00615	0.00456
37-2	3095546	2823591	0.9121	1.471	0.0247	0.00796	0.00489	0.0037	0.00305	0.00231
10-9	5509536	5019562	0.9111	2.733	0.07201	0.02747	0.01721	0.01306	0.0107	0.00804
9-4	3132326	2989836	0.9545	1.62	0.05543	0.02184	0.01339	0.00986	0.0079	0.00578
49-1	3242100	2778549	0.857	1.438	0.05747	0.01786	0.01049	0.00764	0.00607	0.00439
16-16	3375034	3180735	0.9424	1.702	0.0656	0.02373	0.01437	0.01069	0.00859	0.00627
30-5	3953590	3764615	0.9522	2.044	0.03862	0.01343	0.0084	0.00643	0.0053	0.00408
17-2	10839044	9988098	0.9215	4.892	0.06717	0.03134	0.02132	0.01642	0.01374	0.01055
9-10	3037908	2715046	0.8937	1.457	0.02898	0.01507	0.01103	0.00889	0.00752	0.00582
10-8	2945744	2842768	0.965	1.533	0.05856	0.02157	0.01336	0.00991	0.008	0.00587
10-7	3973718	3570827	0.8986	1.94	0.0611	0.0209	0.01253	0.00924	0.00746	0.00547
10-3	3910274	3606918	0.9224	2.001	0.03598	0.01807	0.01294	0.01036	0.00876	0.00673
14-23	4981338	4554285	0.9143	2.35	0.06198	0.0205	0.01259	0.0095	0.00778	0.00584
14-31	3936406	3649763	0.9272	1.995	0.05195	0.01821	0.011	0.0082	0.00663	0.0049
16-22	4358928	4184497	0.96	2.359	0.03216	0.0106	0.00659	0.00505	0.00421	0.00325
9-2	4802254	4313237	0.8982	2.355	0.06858	0.02432	0.01475	0.01099	0.00888	0.0066
14-26	3789610	3497673	0.923	1.792	0.04354	0.01429	0.00875	0.00654	0.00532	0.00398
14-22	3376802	3111735	0.9215	1.62	0.0448	0.01556	0.00971	0.00732	0.00595	0.00443
14-3	2891162	2669605	0.9234	1.37	0.04797	0.01641	0.00982	0.0073	0.00589	0.00432
14-28	2544190	2358219	0.9269	1.261	0.04538	0.0173	0.01047	0.00778	0.00627	0.00462
14-17	4144536	3179967	0.7673	1.635	0.04345	0.01691	0.01041	0.00772	0.00621	0.00457
16-21	4236906	3860510	0.9112	2.088	0.02185	0.01065	0.00736	0.00581	0.00485	0.00373
16-6	3125302	2813286	0.9002	1.506	0.04976	0.0161	0.00967	0.00725	0.00588	0.00438
14-13	3709876	3362840	0.9065	1.841	0.05486	0.0196	0.01174	0.00871	0.00705	0.00522
14-9	3608258	3256501	0.9025	1.71	0.05513	0.01753	0.01057	0.00786	0.00635	0.00464
16-19	4254060	4013619	0.9435	2.111	0.03315	0.01145	0.00718	0.00549	0.00456	0.00349
13-6	3605106	3391721	0.9408	1.79	0.06237	0.02192	0.01364	0.01027	0.0084	0.0062
9-5	4354642	4168186	0.9572	2.278	0.052	0.02271	0.01465	0.01103	0.00898	0.00668
9-13	4447366	3124909	0.7026	1.412	0.0458	0.02133	0.01366	0.01014	0.00808	0.00589
13-3	5438332	4841165	0.8902	2.315	0.03672	0.01944	0.01432	0.0117	0.01005	0.0079
16-15	4703750	4024241	0.8555	2.185	0.06133	0.01962	0.01175	0.00876	0.0071	0.00527
14-34	3780860	3348419	0.8856	1.784	0.04214	0.01854	0.01176	0.00883	0.00714	0.00522
14-16	5428192	5135197	0.946	2.573	0.03469	0.0113	0.00721	0.00554	0.00459	0.00352
