# Supplementary material for: Genetic Diversity Analysis and Core Germplasm Construction of Rubus chingii Hu
Source: Plants (Basel). 2024 Feb 23;13(5):618. doi: 10.3390/plants13050618 (PMC10934504; doi:10.3390/plants13050618)
Supplement: Supplementary file 1 [file plants-13-00618-s001.zip › Table S3 Number and frequency of alleles within R. chingii wild populations.xlsx]

## Sheet: alleles_stat
Type	2-allele	3-allele	4-allele	5-allele	6-allele	7-allele
Number	1737009	142750	24533	4375	1291	1315
Frequency (%)	90.8823	7.46884	1.28359	0.228905	0.0675466	0.0688023
