# Supplementary material for: Genetic Diversity Analysis and Core Germplasm Construction of Rubus chingii Hu
Source: Plants (Basel). 2024 Feb 23;13(5):618. doi: 10.3390/plants13050618 (PMC10934504; doi:10.3390/plants13050618)
Supplement: Supplementary file 1 [file plants-13-00618-s001.zip › Table S4 SNPs and InDels count ,distribution frequency and mean depth of each chromosome.xlsx]

## Sheet: 变异数量统计表
Table S3. SNPs and InDels count ,distribution frequency and mean depth of each chromosome
contig	length	SNPs	InDels	SNPs/kb	Indels/kb	SNP_mean_depth	InDels_mean_depth
Scaffold35	6838	95	37	13.893	5.411	6.725	5.767
Scaffold21	139594	281	108	2.013	0.774	13.323	15.601
Scaffold2	2403295	11401	4268	4.744	1.776	10.792	15.699
Scaffold29	80926	65	29	0.803	0.358	8.191	6.929
Scaffold28	96241	1	5	0.01	0.052	38.333	73.65
Scaffold7	429880	956	344	2.224	0.8	10.645	10.108
Scaffold10	302373	1144	487	3.783	1.611	9.823	14.074
Scaffold32	65318	151	54	2.312	0.827	9.23	16.016
LG03	36967540	220402	87893	5.962	2.378	12.422	17.321
Scaffold23	134560	205	120	1.523	0.892	10.84	13.505
Scaffold13	236684	594	252	2.51	1.065	10.156	12.11
Scaffold11	242154	910	384	3.758	1.586	12.118	16.605
Scaffold37	3025	0	3	0	0.992	NA	26.821
Scaffold26	120330	236	88	1.961	0.731	5.616	5.418
Scaffold34	44842	246	113	5.486	2.52	9.961	10.92
Scaffold25	120726	314	174	2.601	1.441	10.585	14.097
Scaffold27	107342	54	19	0.503	0.177	5.548	7.589
Scaffold24	122687	256	108	2.087	0.88	5.759	8.079
LG05	30375365	178248	70516	5.868	2.321	11.804	16.85
Scaffold9	331893	780	330	2.35	0.994	8.686	10.59
Scaffold1	2678190	6197	2589	2.314	0.967	11.475	16.177
Scaffold15	203689	749	276	3.677	1.355	11.083	15.348
Scaffold33	60377	69	22	1.143	0.364	6.219	6.321
LG02	30721319	200107	79218	6.514	2.579	12.503	16.788
Scaffold3	1243922	5656	2158	4.547	1.735	12.613	18.804
Scaffold6	189279	549	188	2.9	0.993	8.033	13.232
Scaffold14	233747	169	59	0.723	0.252	8.079	9.143
Scaffold17	174322	663	270	3.803	1.549	14.385	36.428
Scaffold8	16206	65	26	4.011	1.604	3.997	4.476
Scaffold22	134570	581	253	4.317	1.88	21.708	42.475
Scaffold19	161123	462	178	2.867	1.105	9.55	11.684
Scaffold30	71002	195	108	2.746	1.521	7.866	12.841
Scaffold12	284695	1507	509	5.293	1.788	11.407	10.062
Scaffold5	959911	3308	1209	3.446	1.259	12.586	17.071
Scaffold18	165915	327	151	1.971	0.91	21.977	14.185
LG01	25612183	162681	63639	6.352	2.485	12.645	16.115
LG04	30246297	182057	72391	6.019	2.393	12.65	17.512
Scaffold31	69364	87	72	1.254	1.038	14.499	12.607
LG06	37158853	251996	98666	6.782	2.655	12.03	16.414
LG07	28973049	172599	67354	5.957	2.325	12.469	15.709
Scaffold20	153120	106	74	0.692	0.483	22.312	20.339
