# Supplementary material for: Genetic Diversity Analysis and Core Germplasm Construction of Rubus chingii Hu
Source: Plants (Basel). 2024 Feb 23;13(5):618. doi: 10.3390/plants13050618 (PMC10934504; doi:10.3390/plants13050618)
Supplement: Supplementary file 1 [file plants-13-00618-s001.zip › Table S5 Specific variation statistics for each sample.xlsx]

## Sheet: Sheet1
Table S4. Specific variation statistics for each sample
Sample	A⇋G	C⇋T	A⇋C	A⇋T	C⇋G	G⇋T	Ts	Tv	Ts/Tv	snp	insertion	deletion	indel	Homo	Het	Homo/Het	total
Total	388421	402533	124862	164698	75377	147959	790954	512896	1.54213	1303850	277138	156021	433159	None	None	0	1737009
9-3	11973	12841	3755	4814	2367	4413	24814	15349	1.617	40163	8670	5483	14153	33062	21254	1.556	54316
9-7	10135	11110	3156	4037	2067	3713	21245	12973	1.638	34218	7455	4369	11824	28968	17074	1.697	46042
9-4	9170	9868	2931	3573	1878	3181	19038	11563	1.646	30601	6428	3737	10165	25634	15132	1.694	40766
14-37	11439	12114	3519	4160	2445	3956	23553	14080	1.673	37633	6110	4039	10149	32130	15652	2.053	47782
9-1	11183	12095	3388	4199	2252	3998	23278	13837	1.682	37115	8118	4728	12846	31573	18388	1.717	49961
14-14	14579	15502	4505	5358	3078	4913	30081	17854	1.685	47935	8363	5609	13972	38229	23678	1.615	61907
14-38	10883	11522	3266	4000	2318	3715	22405	13299	1.685	35704	6278	4072	10350	32127	13927	2.307	46054
49-4	9359	10055	2882	3420	2036	3186	19414	11524	1.685	30938	5568	3446	9014	28410	11542	2.461	39952
10-8	9985	10519	3005	3656	2047	3437	20504	12145	1.688	32649	6096	3956	10052	27105	15596	1.738	42701
9-8	8535	9091	2471	3382	1594	2995	17626	10442	1.688	28068	5550	3475	9025	23743	13350	1.779	37093
14-6	12117	12790	3669	4338	2572	4131	24907	14710	1.693	39617	6538	4424	10962	34893	15686	2.224	50579
14-11	7925	8558	2417	2823	1760	2704	16483	9704	1.699	26187	4332	2674	7006	23191	10002	2.319	33193
9-6	8486	9131	2643	3193	1627	2877	17617	10340	1.704	27957	5582	3225	8807	23352	13412	1.741	36764
10-5	7721	8001	2299	2736	1577	2586	15722	9198	1.709	24920	4668	2729	7397	20514	11803	1.738	32317
9-2	10880	11662	3187	4086	2096	3810	22542	13179	1.71	35721	6665	4362	11027	29198	17550	1.664	46748
14-10	8418	8773	2528	2943	1798	2776	17191	10045	1.711	27236	4483	2834	7317	23934	10619	2.254	34553
10-7	9696	10168	2824	3580	1954	3243	19864	11601	1.712	31465	5597	3676	9273	25690	15048	1.707	40738
15-2	13610	14458	4095	4768	2906	4619	28068	16388	1.713	44456	6585	4539	11124	36921	18659	1.979	55580
13-6	9246	9888	2830	3385	1905	3053	19134	11173	1.713	30307	5617	3523	9140	25104	14343	1.75	39447
10-2	7371	7956	2294	2660	1530	2464	15327	8948	1.713	24275	4730	2798	7528	20534	11269	1.822	31803
16-16	13003	14108	3832	4668	2756	4534	27111	15790	1.717	42901	7384	5278	12662	36482	19081	1.912	55563
9-12	5918	6208	1704	2075	1278	1993	12126	7050	1.72	19176	3298	2037	5335	15375	9136	1.683	24511
14-22	7820	8238	2386	2683	1722	2529	16058	9320	1.723	25378	4107	2566	6673	21986	10065	2.184	32051
14-2	11461	12207	3431	4133	2311	3850	23668	13725	1.724	37393	6126	4308	10434	32853	14974	2.194	47827
14-19	9008	9717	2699	3287	1759	3116	18725	10861	1.724	29586	5064	3403	8467	26354	11699	2.253	38053
14-12	8367	8677	2526	2819	1749	2776	17044	9870	1.727	26914	3876	2666	6542	23269	10187	2.284	33456
13-11	8221	8593	2448	2886	1720	2683	16814	9737	1.727	26551	4609	3038	7647	21367	12831	1.665	34198
18-1	22507	22771	6442	7535	4731	7492	45278	26200	1.728	71478	10765	6980	17745	57462	31761	1.809	89223
14-20	8721	8952	2572	3124	1734	2788	17673	10218	1.73	27891	4247	2980	7227	24695	10423	2.369	35118
14-30	11811	12561	3423	4165	2512	3980	24372	14080	1.731	38452	6575	4307	10882	33898	15436	2.196	49334
37-4	10697	11354	3126	3873	2164	3560	22051	12723	1.733	34774	6226	4075	10301	32981	12094	2.727	45075
14-21	6713	7147	2007	2333	1421	2237	13860	7998	1.733	21858	3584	2201	5785	19583	8060	2.43	27643
14-18	6634	7088	1942	2440	1328	2204	13722	7914	1.734	21636	3593	2461	6054	19056	8634	2.207	27690
14-17	8285	8917	2500	2965	1674	2773	17202	9912	1.735	27114	4026	2894	6920	23629	10405	2.271	34034
16-5	12070	12518	3450	4253	2398	4060	24588	14161	1.736	38749	6624	4283	10907	33325	16331	2.041	49656
14-9	9243	9866	2838	3214	1928	3027	19109	11007	1.736	30116	4505	3163	7668	26590	11194	2.375	37784
49-5	10561	11111	3135	3757	2129	3440	21672	12461	1.739	34133	5950	3888	9838	30543	13428	2.275	43971
15-1	11703	12130	3391	3987	2378	3935	23833	13691	1.741	37524	6525	4080	10605	32830	15299	2.146	48129
9-5	8374	9036	2499	2942	1686	2873	17410	10000	1.741	27410	5267	3321	8588	22423	13575	1.652	35998
14-32	11092	11461	3287	3809	2247	3603	22553	12946	1.742	35499	5885	4012	9897	31835	13561	2.348	45396
16-14	13160	14019	3798	4594	2745	4454	27179	15591	1.743	42770	7282	4984	12266	36826	18210	2.022	55036
14-8	10814	11367	3224	3698	2200	3565	22181	12687	1.748	34868	5342	3795	9137	30176	13829	2.182	44005
14-15	11112	11828	3248	3807	2342	3721	22940	13118	1.749	36058	5506	3984	9490	31493	14055	2.241	45548
13-13	10865	11715	3196	3782	2120	3812	22580	12910	1.749	35490	6081	4465	10546	29359	16677	1.76	46036
13-5	8739	9510	2621	3027	1806	2977	18249	10431	1.749	28680	5172	3429	8601	23213	14068	1.65	37281
14-23	10798	11353	3144	3660	2284	3554	22151	12642	1.752	34793	5302	3651	8953	29911	13835	2.162	43746
14-28	9668	10312	2824	3377	2053	3142	19980	11396	1.753	31376	4941	3391	8332	26952	12756	2.113	39708
14-25	6982	7340	2051	2373	1479	2263	14322	8166	1.754	22488	3672	2414	6086	20073	8501	2.361	28574
14-5	10418	10978	2964	3560	2197	3473	21396	12194	1.755	33590	5148	3686	8834	29285	13139	2.229	42424
14-4	9200	9696	2733	3145	1902	2984	18896	10764	1.755	29660	4447	3204	7651	25596	11715	2.185	37311
14-1	10432	11192	3070	3591	2162	3480	21624	12303	1.758	33927	5042	3686	8728	29391	13264	2.216	42655
16-13	10145	10757	2898	3527	2084	3378	20902	11887	1.758	32789	5133	3601	8734	27309	14214	1.921	41523
49-1	10056	10569	2889	3374	2056	3409	20625	11728	1.759	32353	5299	3471	8770	28665	12458	2.301	41123
9-15	4039	4400	1265	1425	708	1388	8439	4786	1.763	13225	2782	1628	4410	11301	6334	1.784	17635
16-3	8298	8753	2495	2893	1675	2605	17051	9668	1.764	26719	4471	2904	7375	23132	10962	2.11	34094
14-35	10436	10732	2913	3637	2097	3341	21168	11988	1.766	33156	5407	3677	9084	28984	13256	2.186	42240
14-24	9412	9781	2757	3116	1966	3023	19193	10862	1.767	30055	4427	3172	7599	25859	11795	2.192	37654
17-3	7391	7767	2080	2477	1531	2487	15158	8575	1.768	23733	3949	2553	6502	20980	9255	2.267	30235
13-4	9830	10452	2883	3523	1906	3156	20282	11468	1.769	31750	5743	3788	9531	25894	15387	1.683	41281
14-13	10416	10964	3023	3524	2120	3413	21380	12080	1.77	33460	5148	3530	8678	29666	12472	2.379	42138
14-29	8455	8965	2521	2882	1759	2674	17420	9836	1.771	27256	4110	3026	7136	23678	10714	2.21	34392
16-8	9388	9853	2652	3217	1949	3043	19241	10861	1.772	30102	4896	3442	8338	25665	12775	2.009	38440
14-31	10719	11164	3168	3561	2217	3394	21883	12340	1.773	34223	5341	3798	9139	29004	14358	2.02	43362
17-1	8557	9038	2470	2904	1730	2820	17595	9924	1.773	27519	4100	2997	7097	23071	11545	1.998	34616
37-1	6831	7041	1949	2265	1396	2214	13872	7824	1.773	21696	3440	2308	5748	18923	8521	2.221	27444
16-15	11097	11727	3123	3775	2245	3707	22824	12850	1.776	35674	5687	4128	9815	30469	15020	2.029	45489
9-9	7988	8534	2258	2869	1535	2637	16522	9299	1.777	25821	5087	3137	8224	21888	12157	1.8	34045
10-12	7660	8184	2247	2653	1522	2485	15844	8907	1.779	24751	4358	2692	7050	20246	11555	1.752	31801
37-10	10409	10818	3044	3427	2156	3298	21227	11925	1.78	33152	4976	3750	8726	28671	13207	2.171	41878
37-7	9488	9947	2684	3245	1920	3050	19435	10899	1.783	30334	4762	3426	8188	26340	12182	2.162	38522
16-11	9071	9436	2586	3027	1802	2963	18507	10378	1.783	28885	4738	3201	7939	25163	11661	2.158	36824
16-6	9037	9374	2537	2959	1803	3022	18411	10321	1.784	28732	4619	3075	7694	24798	11628	2.133	36426
9-14	7582	8205	2225	2541	1601	2484	15787	8851	1.784	24638	4312	2776	7088	20012	11714	1.708	31726
13-7	7534	8176	2159	2642	1557	2446	15710	8804	1.784	24514	4821	3008	7829	20346	11997	1.696	32343
10-6	8408	8671	2451	2914	1593	2608	17079	9566	1.785	26645	4504	2938	7442	21457	12630	1.699	34087
16-17	9119	9830	2670	3181	1739	3014	18949	10604	1.787	29553	5027	3361	8388	25307	12634	2.003	37941
13-10	7127	7784	2065	2526	1333	2408	14911	8332	1.79	23243	4265	2790	7055	19073	11225	1.699	30298
14-36	9689	9979	2699	3269	1935	3080	19668	10983	1.791	30651	5033	3306	8339	27537	11453	2.404	38990
37-6	8685	8942	2473	2818	1771	2782	17627	9844	1.791	27471	4463	2997	7460	23890	11041	2.164	34931
37-8	7141	7584	2004	2456	1436	2311	14725	8207	1.794	22932	3620	2411	6031	20130	8833	2.279	28963
9-11	5785	6538	1666	2086	1085	2033	12323	6870	1.794	19193	3715	2415	6130	15758	9565	1.647	25323
16-2	7150	7633	1960	2515	1459	2302	14783	8236	1.795	23019	4484	2701	7185	19777	10427	1.897	30204
49-6	9718	10229	2839	3377	1876	3004	19947	11096	1.798	31043	5126	3375	8501	28026	11518	2.433	39544
14-33	10489	10860	2989	3518	2008	3345	21349	11860	1.8	33209	5221	3588	8809	28758	13260	2.169	42018
49-2	10628	11206	2972	3621	2104	3429	21834	12126	1.801	33960	5488	3767	9255	29983	13232	2.266	43215
1 9-13	9504	9737	2558	3287	1788	3051	19241	10684	1.801	29925	6396	3469	9865	25351	14439	1.756	39790
17-2	18505	18736	4985	5953	3602	6062	37241	20602	1.808	57843	10689	6651	17340	47720	27463	1.738	75183
16-10	12928	13519	3619	4230	2613	4169	26447	14631	1.808	41078	7031	4426	11457	34106	18429	1.851	52535
10-1	9794	10741	2808	3452	1867	3229	20535	11356	1.808	31891	5586	3798	9384	25762	15513	1.661	41275
15-3	14340	14969	3915	4784	2748	4756	29309	16203	1.809	45512	8836	5636	14472	39024	20960	1.862	59984
10-9	12708	13457	3588	4347	2427	4096	26165	14458	1.81	40623	6943	4960	11903	31618	20908	1.512	52526
13-12	7557	7997	2159	2561	1489	2384	15554	8593	1.81	24147	3920	2578	6498	19887	10758	1.849	30645
14-3	8833	9311	2518	2915	1804	2782	18144	10019	1.811	28163	4173	2822	6995	24806	10352	2.396	35158
4 9-16	9425	10019	2677	3288	1666	3102	19444	10733	1.812	30177	5700	3594	9294	24728	14743	1.677	39471
16-12	7888	8474	2208	2619	1669	2530	16362	9026	1.813	25388	3939	2714	6653	21333	10708	1.992	32041
14-16	5726	6005	1621	1870	1190	1790	11731	6471	1.813	18202	2464	1712	4176	15308	7070	2.165	22378
37-5	10489	10717	2949	3399	2064	3277	21206	11689	1.814	32895	5480	3765	9245	28879	13261	2.178	42140
16-4	16223	17228	4593	5331	3292	5215	33451	18431	1.815	51882	8763	5893	14656	41324	25214	1.639	66538
14-34	8888	9585	2533	3036	1732	2878	18473	10179	1.815	28652	4807	3285	8092	25227	11517	2.19	36744
10-4	6229	6489	1789	1998	1249	1970	12718	7006	1.815	19724	3318	2046	5364	15877	9211	1.724	25088
16-23	8327	8896	2311	2857	1676	2642	17223	9486	1.816	26709	4152	2940	7092	22915	10886	2.105	33801
16-20	7400	7877	2138	2405	1487	2381	15277	8411	1.816	23688	3622	2527	6149	19696	10141	1.942	29837
13-9	6093	6442	1694	2064	1219	1922	12535	6899	1.817	19434	3417	2152	5569	16091	8912	1.806	25003
13-2	5636	6281	1573	2041	1077	1869	11917	6560	1.817	18477	3422	2308	5730	14699	9508	1.546	24207
16-7	8614	9077	2397	2786	1745	2792	17691	9720	1.82	27411	4538	2900	7438	23395	11454	2.043	34849
10-11	8053	8624	2243	2753	1585	2574	16677	9155	1.822	25832	4232	2866	7098	20924	12006	1.743	32930
37-3	8763	8975	2426	2901	1662	2743	17738	9732	1.823	27470	4315	2968	7283	24357	10396	2.343	34753
9-10	5034	5548	1398	1787	955	1657	10582	5797	1.825	16379	3465	2177	5642	13946	8075	1.727	22021
14-26	8091	8603	2290	2686	1630	2536	16694	9142	1.826	25836	3984	2673	6657	22286	10207	2.183	32493
30-3	7431	7685	2012	2399	1523	2345	15116	8279	1.826	23395	3710	2462	6172	19996	9571	2.089	29567
13-14	8118	8867	2258	2782	1675	2546	16985	9261	1.834	26246	4210	2865	7075	21390	11931	1.793	33321
13-8	6815	7542	1924	2424	1281	2199	14357	7828	1.834	22185	4226	2874	7100	18709	10576	1.769	29285
37-9	8260	8580	2285	2711	1575	2606	16840	9177	1.835	26017	4041	2883	6924	22500	10441	2.155	32941
14-27	6809	7226	1995	2241	1344	2062	14035	7642	1.837	21677	3102	2254	5356	18310	8723	2.099	27033
16-9	9108	9683	2530	2971	1844	2878	18791	10223	1.838	29014	4879	3184	8063	24979	12098	2.065	37077
14-7	9500	9943	2671	3032	1943	2921	19443	10567	1.84	30010	4631	3171	7802	26249	11563	2.27	37812
16-19	6056	6468	1700	1988	1170	1939	12524	6797	1.843	19321	2767	2069	4836	16040	8117	1.976	24157
30-5	7294	7719	2052	2328	1445	2312	15013	8137	1.845	23150	3617	2482	6099	20010	9239	2.166	29249
10-3	6729	6936	1842	2314	1172	2073	13665	7401	1.846	21066	3842	2482	6324	17106	10284	1.663	27390
10-10	6388	6947	1760	2102	1337	2018	13335	7217	1.848	20552	3319	2137	5456	15946	10062	1.585	26008
30-2	8017	8478	2247	2610	1507	2541	16495	8905	1.852	25400	3653	2877	6530	21362	10568	2.021	31930
49-3	6921	7433	1898	2244	1391	2216	14354	7749	1.852	22103	3198	2398	5596	18697	9002	2.077	27699
30-4	5434	5749	1503	1770	1043	1689	11183	6005	1.862	17188	2257	1739	3996	14590	6594	2.213	21184
16-1	7731	8147	2126	2485	1500	2413	15878	8524	1.863	24402	4557	2808	7365	20156	11611	1.736	31767
13-3	7655	8057	2052	2540	1381	2450	15712	8423	1.865	24135	5122	3041	8163	20310	11988	1.694	32298
17-4	6106	6506	1735	1979	1190	1854	12612	6758	1.866	19370	2878	1947	4825	16827	7368	2.284	24195
13-1	4906	5229	1356	1621	949	1494	10135	5420	1.87	15555	2691	1745	4436	13035	6956	1.874	19991
30-1	6618	6785	1818	2051	1295	1974	13403	7138	1.878	20541	2936	2078	5014	17389	8166	2.129	25555
16-18	5954	6125	1584	1897	1118	1798	12079	6397	1.888	18476	2524	1790	4314	15004	7786	1.927	22790
37-2	4755	4805	1304	1495	876	1368	9560	5043	1.896	14603	1987	1431	3418	12791	5230	2.446	18021
16-22	5855	6155	1596	1854	1095	1769	12010	6314	1.902	18324	2515	1864	4379	15123	7580	1.995	22703
16-21	4520	4783	1186	1485	861	1357	9303	4889	1.903	14192	2174	1576	3750	11950	5992	1.994	17942
		*Ts:Transitions
		*Tv:transversions
		*Ts/Tv:Transitions to transversions ratio
		*Homo:homozygous
		*Het:heterozygous
		*Homo/Het:homozygous to heterozygous ratio
