# Supplementary material for: Genetic Diversity Analysis and Core Germplasm Construction of Rubus chingii Hu
Source: Plants (Basel). 2024 Feb 23;13(5):618. doi: 10.3390/plants13050618 (PMC10934504; doi:10.3390/plants13050618)
Supplement: Supplementary file 1 [file plants-13-00618-s001.zip › Table S6 The specific number and proportion of SNPs and InDels annotations.xlsx]

## Sheet: Sheet1
Distribution of SNPs annotations					Distribution of InDels annotations
annotation_position	variant_number	%			variant_type	variant_number	%
intergenic	661807	0.339391			nonsynonymous SNV	157045	0.415177
downstream	184526	0.0946294			synonymous SNV	82460	0.217998
exonic	374843	0.192229			frameshift deletion	25209	0.0666446
intronic	469573	0.240809			frameshift insertion	37383	0.0988288
upstream	211586	0.108506			nonframeshift deletion	5493	0.0145218
upstream;downstream	42493	0.0217915			nonframeshift insertion	15481	0.0409269
splicing	5051	0.00259028			stopgain	13580	0.0359012
exonic;splicing	68	3.49e-05			stoploss	607	0.00160472
UTR5	38	1.95e-05			unknown	41002	0.108396
