# Supplementary material for: Genetic Diversity Analysis and Core Germplasm Construction of Rubus chingii Hu
Source: Plants (Basel). 2024 Feb 23;13(5):618. doi: 10.3390/plants13050618 (PMC10934504; doi:10.3390/plants13050618)
Supplement: Supplementary file 1 [file plants-13-00618-s001.zip › Table S7 Value of the fixation index (Fst).xlsx]

## Sheet: Sheet1
Table S6. Value of The fixation index (Fst)
population	10	13	14	15	16	17	18	30	37	49	9
10		0.194331	0.18099	0.255681	0.196279	0.268882	0.329733	0.225876	0.251095	0.253398	0.189744
13			0.18266	0.25734	0.197002	0.270419	0.327725	0.229725	0.253077	0.259006	0.195519
14				0.165321	0.182589	0.150818	0.20152	0.130666	0.174582	0.166794	0.195026
15					0.187413	0.371915	0.438283	0.324457	0.300513	0.329527	0.248618
16						0.192217	0.245498	0.159836	0.20158	0.198889	0.205933
17							0.462906	0.354165	0.318991	0.350289	0.259581
18								0.43241	0.381353	0.421326	0.316512
30									0.265501	0.294299	0.216997
37										0.271109	0.244075
49											0.245952
