# Supplementary material for: Genetic Diversity Analysis and Core Germplasm Construction of Rubus chingii Hu
Source: Plants (Basel). 2024 Feb 23;13(5):618. doi: 10.3390/plants13050618 (PMC10934504; doi:10.3390/plants13050618)
Supplement: Supplementary file 1 [file plants-13-00618-s001.zip › Table S8 Coreset coverage.xlsx]

## Sheet: Table S7 Coreset coverage
Table S7. Coreset coverage
Iteration	Sample_name	Coverage	Difference
1	16-4	33.4325	33.4325
2	14-15	49.0802	15.6477
3	10-9	57.5299	8.44969
4	37-5	62.9507	5.42083
5	14-14	67.3587	4.40795
6	18-1	70.7574	3.39874
7	13-13	73.4421	2.6847
8	16-5	75.7104	2.26827
9	14-11	77.7508	2.04047
10	13-6	79.3712	1.62037
11	30-2	80.8568	1.48565
12	14-23	82.2016	1.3448
13	9-16	83.3578	1.15618
14	49-5	84.4075	1.04963
15	17-2	85.3762	0.968793
16	37-4	86.2434	0.867137
17	14-6	87.0799	0.836518
18	16-14	87.816	0.736087
19	9-9	88.4761	0.660151
20	14-18	89.1093	0.633206
21	14-36	89.6568	0.547472
22	15-3	90.1908	0.534
23	10-3	90.6685	0.47766
24	14-21	91.1045	0.436018
25	13-3	91.527	0.422546
26	16-17	91.9386	0.411523
27	30-5	92.3182	0.379679
28	14-20	92.6808	0.362532
29	9-7	93.0164	0.335587
30	16-9	93.3226	0.306192
31	14-29	93.6141	0.291495
32	37-2	93.9019	0.287821
33	9-1	94.1762	0.274348
34	15-1	94.4371	0.260876
35	14-32	94.682	0.244954
36	49-4	94.9025	0.220459
37	13-7	95.1083	0.205761
38	14-34	95.3116	0.203312
39	9-10	95.5026	0.191064
40	16-11	95.6864	0.183715
41	14-12	95.8652	0.178816
42	16-2	96.0244	0.15922
43	14-38	96.1812	0.156771
44	37-3	96.3257	0.144523
45	9-5	96.4653	0.139624
46	14-25	96.6025	0.137174
47	16-21	96.7372	0.134725
48	10-5	96.8621	0.124927
49	14-31	96.9822	0.120027
50	9-4	97.0985	0.116353
51	30-4	97.2112	0.112679
52	14-37	97.3165	0.10533
53	37-9	97.4194	0.102881
54	14-19	97.5198	0.100431
55	49-1	97.6154	0.095532
56	14-28	97.7109	0.095532
57	10-11	97.804	0.0930825
58	16-6	97.8922	0.0881834
59	14-3	97.9742	0.0820596
60	16-13	98.0502	0.0759357
61	9-15	98.1261	0.0759357
62	14-33	98.1996	0.0734862
63	13-10	98.2682	0.0685871
64	16-15	98.3343	0.0661376
65	30-1	98.4005	0.0661376
66	16-20	98.4641	0.063688
67	17-3	98.5254	0.0612385
68	37-10	98.5866	0.0612385
69	14-13	98.6454	0.0587889
70	10-10	98.7017	0.0563394
71	13-9	98.7556	0.0538899
72	10-2	98.8095	0.0538899
73	16-16	98.8585	0.0489908
74	9-11	98.9026	0.0440917
75	37-1	98.9467	0.0440917
76	14-10	98.9883	0.0416422
77	14-27	99.03	0.0416422
