# Supplementary material for: Genetic Diversity Analysis and Core Germplasm Construction of Rubus chingii Hu
Source: Plants (Basel). 2024 Feb 23;13(5):618. doi: 10.3390/plants13050618 (PMC10934504; doi:10.3390/plants13050618)
Supplement: Supplementary file 1 [file plants-13-00618-s001.zip › Table S9 Population imformation.xlsx]

## Sheet: Sheet1
Table S8. Population information
Population numbering	Number of individuals	collection point	latitude	longitude
9	16	Jiangxi,China	N:28°50′15″	E:118°01′02″
10	12	Jiangxi,China	N:29°17′20″	E:117°56′43″
13	14	Jiangxi,China	N:29°53′12″	E:117°08′22″
14	38	Jiangxi,China	N:28°45′59″	E:117°20′57″
15	3	Fujian,China	N:28°14′37″	E:118°27′09″
16	23	Fujian,China	N:28°09′32″	E:118°43′19″
17	4	Fujian,China	N:26°47′46″	E:119°24′02″
18	1	Fujian,China	N:26°47′41″	E:119°22′18″
30	5	Jiangxi,China	N:27°58′3″	E:117°1′29″
37	10	Jiangxi,China	N:27°36′53″	E:114°14′56″
49	6	Jiangxi,China	N:26°35′1″	E:114°9′10″
