# Supplementary material for: Genetic Diversity Analysis and Core Germplasm Construction of Rubus chingii Hu
Source: Plants (Basel). 2024 Feb 23;13(5):618. doi: 10.3390/plants13050618 (PMC10934504; doi:10.3390/plants13050618)
Supplement: Supplementary file 1 [file plants-13-00618-s001.zip › Table S10 Basic Population Genetic Parameters.xlsx]

## Sheet: LG01
# Variant positions
# Pop ID	Private	Num_Indv	Var	StdErr	P	Var	StdErr	Obs_Het	Var	StdErr	Obs_Hom	Var	StdErr	Exp_Het	Var	StdErr	Exp_Hom	Var	StdErr	Pi	Var	StdErr	Fis	Var	StdErr
10	9326	4.64899	13.1934	0.01199	0.95361	0.01471	0.0004	0.04268	0.02505	0.00052	0.95732	0.02505	0.00052	0.05905	0.01993	0.00047	0.94095	0.01993	0.00047	0.07638	0.03866	0.00065	0.0714	0.06571	0.01199
13	9561	5.10601	17.3818	0.01378	0.9552	0.0144	0.0004	0.04334	0.02602	0.00053	0.95666	0.02602	0.00053	0.05678	0.0193	0.00046	0.94322	0.0193	0.00046	0.07406	0.03831	0.00065	0.06515	0.06101	0.01378
14	29031	11.5411	127.794	0.03382	0.92916	0.01902	0.00041	0.04212	0.01943	0.00042	0.95788	0.01943	0.00042	0.09361	0.02627	0.00048	0.90639	0.02627	0.00048	0.11215	0.04336	0.00062	0.1818	0.1404	0.03382
15	4762	1.80436	0.69683	0.00324	0.96027	0.01489	0.00047	0.04993	0.03555	0.00073	0.95007	0.03555	0.00073	0.04652	0.01831	0.00052	0.95348	0.01831	0.00052	0.06855	0.04405	0.00081	0.03	0.03182	0.00324
16	17103	7.57954	46.7103	0.02132	0.94071	0.01725	0.00041	0.0421	0.02117	0.00045	0.9579	0.02117	0.00045	0.07704	0.02379	0.00048	0.92296	0.02379	0.00048	0.09441	0.04086	0.00063	0.12214	0.10351	0.02132
17	3292	2.08833	1.30918	0.00465	0.97041	0.01143	0.00043	0.04443	0.03337	0.00074	0.95557	0.03337	0.00074	0.03458	0.01396	0.00048	0.96542	0.01396	0.00048	0.05187	0.03531	0.00076	0.0122	0.01798	0.00465
18	3402	1	0	0	0.9625	0.01734	0.00064	0.075	0.06937	0.00128	0.925	0.06937	0.00128	0.0375	0.01734	0.00064	0.9625	0.01734	0.00064	0.075	0.06937	0.00128	0	0	0
30	2642	2.39838	2.14411	0.0061	0.97321	0.00974	0.00041	0.03038	0.01992	0.00059	0.96962	0.01992	0.00059	0.03267	0.01268	0.00047	0.96733	0.01268	0.00047	0.04465	0.02661	0.00068	0.02499	0.02667	0.0061
37	6685	3.99627	9.25297	0.01069	0.96435	0.01189	0.00038	0.03405	0.02057	0.0005	0.96595	0.02057	0.0005	0.04498	0.01609	0.00045	0.95502	0.01609	0.00045	0.05817	0.03069	0.00062	0.04911	0.04869	0.01069
49	5171	2.79917	3.13012	0.0065	0.96674	0.01163	0.0004	0.0317	0.01942	0.00051	0.9683	0.01942	0.00051	0.04105	0.01542	0.00046	0.95895	0.01542	0.00046	0.05431	0.03006	0.00064	0.04115	0.04078	0.0065
9	13577	5.45386	21.3123	0.01476	0.94636	0.01671	0.00041	0.05053	0.02967	0.00055	0.94947	0.02967	0.00055	0.06811	0.02232	0.00048	0.93189	0.02232	0.00048	0.08847	0.04409	0.00067	0.08226	0.07448	0.01476
# All positions (variant and fixed)
# Pop ID	Private	Sites	Variant_Sites	Polymorphic_Sites	%Polymorphic_Loci	Num_Indv	Var	StdErr	P	Var	StdErr	Obs_Het	Var	StdErr	Obs_Hom	Var	StdErr	Exp_Het	Var	StdErr	Exp_Hom	Var	StdErr	Pi	Var	StdErr	Fis	Var	StdErr
10	9326	94137	91712	16320	17.3364	4.55853	13.1763	0.01183	0.9548	0.01439	0.00039	0.04158	0.02445	0.00051	0.95842	0.02445	0.00051	0.05753	0.0195	0.00046	0.94247	0.0195	0.00046	0.07442	0.03781	0.00063	0.06956	0.06414	0.01183
13	9561	93667	91500	15996	17.0775	5.01531	17.348	0.01361	0.95624	0.01412	0.00039	0.04234	0.02546	0.00052	0.95766	0.02546	0.00052	0.05546	0.01892	0.00045	0.94454	0.01892	0.00045	0.07235	0.03754	0.00063	0.06364	0.0597	0.01361
14	29031	118709	111742	39612	33.369	10.939	126.231	0.03261	0.93332	0.01818	0.00039	0.03964	0.01839	0.00039	0.96036	0.01839	0.00039	0.08811	0.02522	0.00046	0.91189	0.02522	0.00046	0.10557	0.04151	0.00059	0.17113	0.13398	0.03261
15	4762	67761	66449	7342	10.8351	1.78935	0.69547	0.0032	0.96104	0.01463	0.00046	0.04896	0.03491	0.00072	0.95104	0.03491	0.00072	0.04562	0.01799	0.00052	0.95438	0.01799	0.00052	0.06723	0.04328	0.0008	0.02942	0.03122	0.0032
16	17103	107103	102744	26528	24.7687	7.32032	46.4462	0.02082	0.94312	0.01669	0.00039	0.04038	0.02037	0.00044	0.95962	0.02037	0.00044	0.0739	0.02305	0.00046	0.9261	0.02305	0.00046	0.09057	0.03954	0.00061	0.11717	0.09988	0.02082
17	3292	61519	60565	5064	8.2316	2.07287	1.30652	0.00461	0.97086	0.01126	0.00043	0.04374	0.03289	0.00073	0.95626	0.03289	0.00073	0.03405	0.01376	0.00047	0.96595	0.01376	0.00047	0.05107	0.0348	0.00075	0.01201	0.0177	0.00461
18	3402	42892	42135	3160	7.36734	1	0	0	0.96316	0.01706	0.00063	0.07367	0.06825	0.00126	0.92633	0.06825	0.00126	0.03684	0.01706	0.00063	0.96316	0.01706	0.00063	0.07367	0.06825	0.00126	0	0	0
30	2642	58282	57638	4876	8.36622	2.38394	2.14124	0.00606	0.9735	0.00964	0.00041	0.03005	0.01971	0.00058	0.96995	0.01971	0.00058	0.03231	0.01256	0.00046	0.96769	0.01256	0.00046	0.04416	0.02634	0.00067	0.02472	0.02638	0.00606
37	6685	82739	80998	10621	12.8368	3.93598	9.23607	0.01057	0.9651	0.01167	0.00038	0.03334	0.02016	0.00049	0.96666	0.02016	0.00049	0.04404	0.01579	0.00044	0.95596	0.01579	0.00044	0.05694	0.03011	0.0006	0.04808	0.04771	0.01057
49	5171	75609	74166	8046	10.6416	2.76644	3.1296	0.00643	0.96737	0.01143	0.00039	0.03109	0.01907	0.0005	0.96891	0.01907	0.0005	0.04027	0.01516	0.00045	0.95973	0.01516	0.00045	0.05328	0.02955	0.00063	0.04036	0.04004	0.00643
9	13577	101399	97775	20577	20.2931	5.29975	21.2126	0.01446	0.94828	0.01621	0.0004	0.04872	0.0287	0.00053	0.95128	0.0287	0.00053	0.06568	0.02168	0.00046	0.93432	0.02168	0.00046	0.08531	0.04278	0.00065	0.07932	0.07205	0.01446
Num_Indv: Mean number of individuals per locus in this population.
Var: Variance
StdErr: Standard Error
P: Mean frequency of the most frequent allele at each locus in this population.
Obs_Het: Mean obsered heterozygosity in this population.
Obs_Hom: Mean observed homozygosity in this population.
Exp_Het: Mean expected heterozygosity in this population.
Exp_Hom: Mean expected homozygosity in this population.
Pi: Mean value of an estimate of nucleotide diversity in this population.
Fis: Mean measure of the inbreeding coefficient of an individual (I) relative to the subpopulation (S) in this population.

## Sheet: LG02
# Variant positions
# Pop ID	Private	Num_Indv	Var	StdErr	P	Var	StdErr	Obs_Het	Var	StdErr	Obs_Hom	Var	StdErr	Exp_Het	Var	StdErr	Exp_Hom	Var	StdErr	Pi	Var	StdErr	Fis	Var	StdErr
10	10765	4.59699	12.7961	0.01065	0.95346	0.01472	0.00036	0.04162	0.02395	0.00046	0.95838	0.02395	0.00046	0.0593	0.02004	0.00042	0.9407	0.02004	0.00042	0.07612	0.03804	0.00058	0.07236	0.06607	0.01065
13	11644	5.02975	16.844	0.01221	0.95356	0.01463	0.00036	0.04444	0.02572	0.00048	0.95556	0.02572	0.00048	0.05931	0.01994	0.00042	0.94069	0.01994	0.00042	0.07645	0.03847	0.00058	0.06871	0.06325	0.01221
14	36144	11.5273	125.73	0.03016	0.92802	0.01918	0.00037	0.04286	0.01992	0.00038	0.95714	0.01992	0.00038	0.09524	0.02653	0.00044	0.90476	0.02653	0.00044	0.11407	0.04392	0.00056	0.18516	0.1422	0.03016
15	5772	1.78519	0.67715	0.00289	0.96186	0.01425	0.00042	0.0482	0.03408	0.00065	0.9518	0.03408	0.00065	0.04488	0.01766	0.00047	0.95512	0.01766	0.00047	0.06587	0.04211	0.00072	0.02837	0.03054	0.00289
16	20741	7.56812	45.942	0.01898	0.93913	0.01768	0.00037	0.0437	0.02209	0.00042	0.9563	0.02209	0.00042	0.07897	0.0243	0.00044	0.92103	0.0243	0.00044	0.09679	0.04181	0.00057	0.12364	0.10444	0.01898
17	4741	2.06251	1.30376	0.00414	0.96799	0.0124	0.0004	0.04782	0.03615	0.00069	0.95218	0.03615	0.00069	0.03718	0.01504	0.00044	0.96282	0.01504	0.00044	0.05606	0.03835	0.00071	0.01339	0.01963	0.00414
18	3949	1	0	0	0.96093	0.01801	0.00059	0.07815	0.07204	0.00118	0.92185	0.07204	0.00118	0.03907	0.01801	0.00059	0.96093	0.01801	0.00059	0.07815	0.07204	0.00118	0	0	0
30	2942	2.37075	2.12214	0.00544	0.97165	0.01041	0.00038	0.03096	0.02038	0.00053	0.96904	0.02038	0.00053	0.03427	0.01344	0.00043	0.96573	0.01344	0.00043	0.04684	0.028	0.00062	0.02769	0.02884	0.00544
37	8114	3.99451	9.15039	0.00955	0.9635	0.01226	0.00035	0.03325	0.02004	0.00045	0.96675	0.02004	0.00045	0.04583	0.01644	0.0004	0.95417	0.01644	0.0004	0.05917	0.03113	0.00056	0.05237	0.05137	0.00955
49	6011	2.81717	3.14479	0.00585	0.9671	0.01153	0.00035	0.03468	0.02187	0.00049	0.96532	0.02187	0.00049	0.04058	0.01522	0.00041	0.95942	0.01522	0.00041	0.05438	0.03076	0.00058	0.03576	0.03681	0.00585
9	16544	5.41749	20.706	0.01309	0.94402	0.01736	0.00038	0.05237	0.03081	0.0005	0.94763	0.03081	0.0005	0.07097	0.0232	0.00044	0.92903	0.0232	0.00044	0.09212	0.04568	0.00061	0.08536	0.07726	0.01309
# All positions (variant and fixed)
# Pop ID	Private	Sites	Variant_Sites	Polymorphic_Sites	%Polymorphic_Loci	Num_Indv	Var	StdErr	P	Var	StdErr	Obs_Het	Var	StdErr	Obs_Hom	Var	StdErr	Exp_Het	Var	StdErr	Exp_Hom	Var	StdErr	Pi	Var	StdErr	Fis	Var	StdErr
10	10765	115620	112822	20052	17.343	4.51321	12.7803	0.01051	0.95459	0.01442	0.00035	0.04061	0.02341	0.00045	0.95939	0.02341	0.00045	0.05787	0.01963	0.00041	0.94213	0.01963	0.00041	0.07428	0.03725	0.00057	0.07061	0.06459	0.01051
13	11644	115749	112997	20542	17.747	4.93698	16.8084	0.01205	0.95466	0.01433	0.00035	0.04338	0.02516	0.00047	0.95662	0.02516	0.00047	0.0579	0.01954	0.00041	0.9421	0.01954	0.00041	0.07463	0.03769	0.00057	0.06708	0.06185	0.01205
14	36144	146731	138205	49752	33.907	10.9318	124.299	0.02911	0.93221	0.01835	0.00035	0.04037	0.01886	0.00036	0.95963	0.01886	0.00036	0.0897	0.02548	0.00042	0.9103	0.02548	0.00042	0.10744	0.04208	0.00054	0.1744	0.13582	0.02911
15	5772	82769	81303	8700	10.5112	1.77199	0.67578	0.00286	0.96253	0.01402	0.00041	0.04734	0.03352	0.00064	0.95266	0.03352	0.00064	0.04408	0.01738	0.00046	0.95592	0.01738	0.00046	0.0647	0.04144	0.00071	0.02787	0.03001	0.00286
16	20741	132830	127504	33622	25.312	7.31163	45.7128	0.01855	0.94157	0.01711	0.00036	0.04195	0.02127	0.0004	0.95805	0.02127	0.0004	0.07581	0.02357	0.00042	0.92419	0.02357	0.00042	0.09291	0.04049	0.00055	0.11869	0.10084	0.01855
17	4741	77315	76030	6759	8.74216	2.04585	1.30018	0.0041	0.96852	0.01221	0.0004	0.04702	0.03559	0.00068	0.95298	0.03559	0.00068	0.03656	0.01481	0.00044	0.96344	0.01481	0.00044	0.05513	0.03777	0.0007	0.01317	0.01931	0.0041
18	3949	52724	51953	4060	7.70048	1	0	0	0.9615	0.01777	0.00058	0.077	0.07108	0.00116	0.923	0.07108	0.00116	0.0385	0.01777	0.00058	0.9615	0.01777	0.00058	0.077	0.07108	0.00116	0	0	0
30	2942	72467	71752	6238	8.60806	2.35809	2.11922	0.00541	0.97193	0.01032	0.00038	0.03065	0.02019	0.00053	0.96935	0.02019	0.00053	0.03393	0.01332	0.00043	0.96607	0.01332	0.00043	0.04638	0.02775	0.00062	0.02741	0.02856	0.00541
37	8114	102687	100414	13372	13.0221	3.93132	9.13494	0.00943	0.9643	0.01201	0.00034	0.03251	0.01962	0.00044	0.96749	0.01962	0.00044	0.04482	0.01612	0.0004	0.95518	0.01612	0.0004	0.05786	0.03052	0.00055	0.05121	0.05029	0.00943
49	6011	93696	91907	9928	10.596	2.78427	3.1448	0.00579	0.96773	0.01133	0.00035	0.03402	0.02148	0.00048	0.96598	0.02148	0.00048	0.0398	0.01496	0.0004	0.9602	0.01496	0.0004	0.05334	0.03023	0.00057	0.03507	0.03613	0.00579
9	16544	125052	120834	26273	21.0097	5.27309	20.6222	0.01284	0.94591	0.01688	0.00037	0.05061	0.02986	0.00049	0.94939	0.02986	0.00049	0.06857	0.02259	0.00042	0.93143	0.02259	0.00042	0.08901	0.04442	0.0006	0.08248	0.0749	0.01284
Num_Indv: Mean number of individuals per locus in this population.
Var: Variance
StdErr: Standard Error
P: Mean frequency of the most frequent allele at each locus in this population.
Obs_Het: Mean obsered heterozygosity in this population.
Obs_Hom: Mean observed homozygosity in this population.
Exp_Het: Mean expected heterozygosity in this population.
Exp_Hom: Mean expected homozygosity in this population.
Pi: Mean value of an estimate of nucleotide diversity in this population.
Fis: Mean measure of the inbreeding coefficient of an individual (I) relative to the subpopulation (S) in this population.

## Sheet: LG03
# Variant positions
# Pop ID	Private	Num_Indv	Var	StdErr	P	Var	StdErr	Obs_Het	Var	StdErr	Obs_Hom	Var	StdErr	Exp_Het	Var	StdErr	Exp_Hom	Var	StdErr	Pi	Var	StdErr	Fis	Var	StdErr
10	12162	4.63796	12.9262	0.0102	0.95332	0.01477	0.00034	0.04258	0.02448	0.00044	0.95742	0.02448	0.00044	0.05948	0.02003	0.0004	0.94052	0.02003	0.0004	0.07659	0.03836	0.00056	0.07128	0.0655	0.0102
13	12949	5.01153	16.5925	0.01157	0.95291	0.01489	0.00035	0.04491	0.02659	0.00046	0.95509	0.02659	0.00046	0.05995	0.02018	0.0004	0.94005	0.02018	0.0004	0.07769	0.03946	0.00056	0.06993	0.06471	0.01157
14	38773	11.5502	125.005	0.02869	0.92823	0.01916	0.00036	0.04476	0.02093	0.00037	0.95524	0.02093	0.00037	0.09492	0.02652	0.00042	0.90508	0.02652	0.00042	0.11379	0.04395	0.00054	0.17929	0.13926	0.02869
15	6042	1.79446	0.68617	0.00276	0.96178	0.01448	0.0004	0.04862	0.03528	0.00063	0.95138	0.03528	0.00063	0.04456	0.01774	0.00044	0.95544	0.01774	0.00044	0.06608	0.04315	0.00069	0.0281	0.03033	0.00276
16	23247	7.50701	45.7277	0.01808	0.94161	0.0169	0.00035	0.04291	0.02176	0.00039	0.95709	0.02176	0.00039	0.07615	0.02338	0.00041	0.92385	0.02338	0.00041	0.09335	0.04036	0.00054	0.11881	0.10173	0.01808
17	4559	2.08478	1.30593	0.00397	0.9697	0.01163	0.00037	0.04648	0.0348	0.00065	0.95352	0.0348	0.00065	0.03551	0.01426	0.00041	0.96449	0.01426	0.00041	0.05362	0.03663	0.00066	0.01165	0.01727	0.00397
18	4721	1	0	0	0.96145	0.01779	0.00056	0.07711	0.07117	0.00112	0.92289	0.07117	0.00112	0.03855	0.01779	0.00056	0.96145	0.01779	0.00056	0.07711	0.07117	0.00112	0	0	0
30	3514	2.34951	2.05583	0.00512	0.97159	0.01028	0.00036	0.0318	0.02096	0.00052	0.9682	0.02096	0.00052	0.03465	0.01344	0.00041	0.96535	0.01344	0.00041	0.04739	0.02815	0.0006	0.02754	0.02914	0.00512
37	8827	3.99762	9.18869	0.00916	0.96335	0.01225	0.00033	0.03364	0.02017	0.00043	0.96636	0.02017	0.00043	0.04611	0.01654	0.00039	0.95389	0.01654	0.00039	0.05936	0.03108	0.00053	0.05216	0.05114	0.00916
49	6973	2.77019	3.04734	0.00549	0.96589	0.01204	0.00035	0.03421	0.02159	0.00046	0.96579	0.02159	0.00046	0.04181	0.01577	0.0004	0.95819	0.01577	0.0004	0.05621	0.03197	0.00056	0.03954	0.03936	0.00549
9	18870	5.41394	20.8856	0.01252	0.9433	0.0175	0.00036	0.05369	0.03151	0.00049	0.94631	0.03151	0.00049	0.07196	0.02334	0.00042	0.92804	0.02334	0.00042	0.09365	0.04644	0.00059	0.08608	0.07732	0.01252
# All positions (variant and fixed)
# Pop ID	Private	Sites	Variant_Sites	Polymorphic_Sites	%Polymorphic_Loci	Num_Indv	Var	StdErr	P	Var	StdErr	Obs_Het	Var	StdErr	Obs_Hom	Var	StdErr	Exp_Het	Var	StdErr	Exp_Hom	Var	StdErr	Pi	Var	StdErr	Fis	Var	StdErr
10	12162	127567	124358	22350	17.5202	4.55008	12.9135	0.01006	0.95449	0.01445	0.00034	0.04151	0.02391	0.00043	0.95849	0.02391	0.00043	0.05798	0.01961	0.00039	0.94202	0.01961	0.00039	0.07466	0.03754	0.00054	0.06949	0.06398	0.01006
13	12949	127041	123847	22646	17.8257	4.91562	16.5527	0.01141	0.9541	0.01457	0.00034	0.04378	0.02597	0.00045	0.95622	0.02597	0.00045	0.05845	0.01976	0.00039	0.94155	0.01976	0.00039	0.07573	0.03861	0.00055	0.06818	0.06321	0.01141
14	38773	161847	151916	54359	33.5867	10.9214	123.551	0.02763	0.93264	0.01828	0.00034	0.04201	0.01976	0.00035	0.95799	0.01976	0.00035	0.0891	0.02541	0.0004	0.9109	0.02541	0.0004	0.1068	0.042	0.00051	0.16828	0.13257	0.02763
15	6042	91853	90290	9470	10.31	1.78174	0.68491	0.00273	0.96243	0.01426	0.00039	0.0478	0.03472	0.00061	0.9522	0.03472	0.00061	0.0438	0.01747	0.00044	0.9562	0.01747	0.00044	0.06496	0.04249	0.00068	0.02762	0.02983	0.00273
16	23247	146005	139892	36155	24.7629	7.24375	45.4517	0.01764	0.94406	0.01633	0.00033	0.04112	0.02093	0.00038	0.95888	0.02093	0.00038	0.07297	0.02264	0.00039	0.92703	0.02264	0.00039	0.08944	0.03902	0.00052	0.11384	0.09804	0.01764
17	4559	84328	83034	7151	8.47998	2.06928	1.30328	0.00393	0.97017	0.01146	0.00037	0.04577	0.0343	0.00064	0.95423	0.0343	0.00064	0.03496	0.01406	0.00041	0.96504	0.01406	0.00041	0.0528	0.03611	0.00065	0.01147	0.01701	0.00393
18	4721	57850	56841	4383	7.57649	1	0	0	0.96212	0.01751	0.00055	0.07576	0.07003	0.0011	0.92424	0.07003	0.0011	0.03788	0.01751	0.00055	0.96212	0.01751	0.00055	0.07576	0.07003	0.0011	0	0	0
30	3514	79320	78472	6977	8.79602	2.33641	2.05221	0.00509	0.97189	0.01018	0.00036	0.03146	0.02074	0.00051	0.96854	0.02074	0.00051	0.03428	0.01331	0.00041	0.96572	0.01331	0.00041	0.04689	0.02787	0.00059	0.02725	0.02884	0.00509
37	8827	111901	109449	14556	13.0079	3.93469	9.17157	0.00905	0.96415	0.01201	0.00033	0.0329	0.01976	0.00042	0.9671	0.01976	0.00042	0.0451	0.01622	0.00038	0.9549	0.01622	0.00038	0.05806	0.03047	0.00052	0.05102	0.05008	0.00905
49	6973	102897	101003	11081	10.769	2.73945	3.04603	0.00544	0.96652	0.01184	0.00034	0.03358	0.02121	0.00045	0.96642	0.02121	0.00045	0.04104	0.01551	0.00039	0.95896	0.01551	0.00039	0.05518	0.03144	0.00055	0.03881	0.03867	0.00544
9	18870	138292	133331	29527	21.3512	5.26198	20.7819	0.01226	0.94534	0.01698	0.00035	0.05176	0.03048	0.00047	0.94824	0.03048	0.00047	0.06938	0.02268	0.00041	0.93062	0.02268	0.00041	0.09029	0.04507	0.00057	0.08299	0.07481	0.01226
Num_Indv: Mean number of individuals per locus in this population.
Var: Variance
StdErr: Standard Error
P: Mean frequency of the most frequent allele at each locus in this population.
Obs_Het: Mean obsered heterozygosity in this population.
Obs_Hom: Mean observed homozygosity in this population.
Exp_Het: Mean expected heterozygosity in this population.
Exp_Hom: Mean expected homozygosity in this population.
Pi: Mean value of an estimate of nucleotide diversity in this population.
Fis: Mean measure of the inbreeding coefficient of an individual (I) relative to the subpopulation (S) in this population.

## Sheet: LG04
# Variant positions
# Pop ID	Private	Num_Indv	Var	StdErr	P	Var	StdErr	Obs_Het	Var	StdErr	Obs_Hom	Var	StdErr	Exp_Het	Var	StdErr	Exp_Hom	Var	StdErr	Pi	Var	StdErr	Fis	Var	StdErr
10	10094	4.62834	13.0344	0.01126	0.95317	0.01477	0.00038	0.04266	0.02492	0.00049	0.95734	0.02492	0.00049	0.05973	0.0201	0.00044	0.94027	0.0201	0.00044	0.07692	0.03859	0.00061	0.07292	0.06707	0.01126
13	10355	5.03157	16.8425	0.01283	0.95429	0.01455	0.00038	0.04259	0.02511	0.0005	0.95741	0.02511	0.0005	0.05815	0.01968	0.00044	0.94185	0.01968	0.00044	0.07498	0.03803	0.00061	0.06956	0.06426	0.01283
14	32117	11.6227	126.679	0.03182	0.92841	0.01924	0.00039	0.04291	0.01993	0.0004	0.95709	0.01993	0.0004	0.09446	0.02654	0.00046	0.90554	0.02654	0.00046	0.11324	0.04388	0.00059	0.18212	0.14075	0.03182
15	5329	1.80377	0.68811	0.00305	0.96	0.01489	0.00045	0.04962	0.035	0.00069	0.95038	0.035	0.00069	0.04703	0.01842	0.0005	0.95297	0.01842	0.0005	0.06901	0.04392	0.00077	0.03118	0.03294	0.00305
16	18883	7.57563	46.4108	0.02005	0.94067	0.01717	0.00039	0.04315	0.02194	0.00044	0.95685	0.02194	0.00044	0.07728	0.02369	0.00045	0.92272	0.02369	0.00045	0.09482	0.041	0.0006	0.12153	0.10349	0.02005
17	3893	2.07464	1.30969	0.00437	0.96928	0.0119	0.00042	0.04667	0.03535	0.00072	0.95333	0.03535	0.00072	0.03575	0.0145	0.00046	0.96425	0.0145	0.00046	0.0537	0.03668	0.00073	0.01144	0.01853	0.00437
18	3764	1	0	0	0.96231	0.01742	0.0006	0.07537	0.06969	0.00121	0.92463	0.06969	0.00121	0.03769	0.01742	0.0006	0.96231	0.01742	0.0006	0.07537	0.06969	0.00121	0	0	0
30	2771	2.35734	2.06916	0.00566	0.97191	0.01009	0.0004	0.03151	0.02091	0.00057	0.96849	0.02091	0.00057	0.03442	0.01331	0.00045	0.96558	0.01331	0.00045	0.0471	0.02797	0.00066	0.02798	0.02961	0.00566
37	7496	3.99403	9.13029	0.01004	0.96276	0.01238	0.00037	0.03422	0.02057	0.00048	0.96578	0.02057	0.00048	0.04695	0.01674	0.00043	0.95305	0.01674	0.00043	0.06055	0.03169	0.00059	0.05346	0.05245	0.01004
49	5773	2.81838	3.1554	0.00615	0.96543	0.01201	0.00038	0.0366	0.02282	0.00052	0.9634	0.02282	0.00052	0.04272	0.01594	0.00044	0.95728	0.01594	0.00044	0.05714	0.03209	0.00062	0.0374	0.03806	0.00615
9	15083	5.39868	21.0046	0.01382	0.94372	0.01747	0.0004	0.05371	0.03186	0.00054	0.94629	0.03186	0.00054	0.07128	0.02332	0.00046	0.92872	0.02332	0.00046	0.09287	0.04639	0.00065	0.08375	0.07617	0.01382
# All positions (variant and fixed)
# Pop ID	Private	Sites	Variant_Sites	Polymorphic_Sites	%Polymorphic_Loci	Num_Indv	Var	StdErr	P	Var	StdErr	Obs_Het	Var	StdErr	Obs_Hom	Var	StdErr	Exp_Het	Var	StdErr	Exp_Hom	Var	StdErr	Pi	Var	StdErr	Fis	Var	StdErr
10	10094	105502	102781	18439	17.4774	4.53719	13.0194	0.01111	0.95438	0.01444	0.00037	0.04156	0.02432	0.00048	0.95844	0.02432	0.00048	0.05819	0.01968	0.00043	0.94181	0.01968	0.00043	0.07494	0.03774	0.0006	0.07104	0.06548	0.01111
13	10355	104863	102325	18196	17.3522	4.93773	16.8095	0.01266	0.95539	0.01425	0.00037	0.04156	0.02455	0.00048	0.95844	0.02455	0.00048	0.05674	0.01929	0.00043	0.94326	0.01929	0.00043	0.07317	0.03724	0.0006	0.06787	0.06282	0.01266
14	32117	132999	125111	44548	33.495	11.0115	125.268	0.03069	0.93265	0.01838	0.00037	0.04037	0.01885	0.00038	0.95963	0.01885	0.00038	0.08886	0.02546	0.00044	0.91114	0.02546	0.00044	0.10653	0.042	0.00056	0.17132	0.13426	0.03069
15	5329	75303	73981	8294	11.0142	1.79037	0.6869	0.00302	0.9607	0.01465	0.00044	0.04875	0.03443	0.00068	0.95125	0.03443	0.00068	0.04621	0.01813	0.00049	0.95379	0.01813	0.00049	0.0678	0.04323	0.00076	0.03063	0.03238	0.00302
16	18883	120179	115500	30352	25.2557	7.32865	46.1571	0.0196	0.94298	0.01663	0.00037	0.04147	0.02115	0.00042	0.95853	0.02115	0.00042	0.07428	0.02299	0.00044	0.92572	0.02299	0.00044	0.09113	0.03974	0.00058	0.1168	0.10001	0.0196
17	3893	69839	68691	5873	8.40934	2.05811	1.3062	0.00432	0.96979	0.01172	0.00041	0.04591	0.03481	0.00071	0.95409	0.03481	0.00071	0.03516	0.01428	0.00045	0.96484	0.01428	0.00045	0.05282	0.03612	0.00072	0.01125	0.01823	0.00432
18	3764	48646	47749	3599	7.39835	1	0	0	0.96301	0.01713	0.00059	0.07398	0.06851	0.00119	0.92602	0.06851	0.00119	0.03699	0.01713	0.00059	0.96301	0.01713	0.00059	0.07398	0.06851	0.00119	0	0	0
30	2771	65223	64552	5720	8.76991	2.34416	2.06611	0.00563	0.9722	0.00999	0.00039	0.03118	0.0207	0.00056	0.96882	0.0207	0.00056	0.03407	0.01319	0.00045	0.96593	0.01319	0.00045	0.04661	0.0277	0.00065	0.02769	0.02931	0.00563
37	7496	92794	90613	12346	13.3047	3.9267	9.11631	0.00991	0.96364	0.01212	0.00036	0.03342	0.02012	0.00047	0.96658	0.02012	0.00047	0.04585	0.0164	0.00042	0.95415	0.0164	0.00042	0.05913	0.03103	0.00058	0.0522	0.05128	0.00991
49	5773	84977	83329	9439	11.1077	2.78461	3.15523	0.00609	0.9661	0.0118	0.00037	0.03589	0.02241	0.00051	0.96411	0.02241	0.00051	0.04189	0.01567	0.00043	0.95811	0.01567	0.00043	0.05603	0.03153	0.00061	0.03668	0.03735	0.00609
9	15083	114137	110044	23997	21.0247	5.24712	20.8961	0.01353	0.94574	0.01695	0.00039	0.05179	0.03081	0.00052	0.94821	0.03081	0.00052	0.06872	0.02266	0.00045	0.93128	0.02266	0.00045	0.08954	0.04502	0.00063	0.08075	0.07369	0.01353
Num_Indv: Mean number of individuals per locus in this population.
Var: Variance
StdErr: Standard Error
P: Mean frequency of the most frequent allele at each locus in this population.
Obs_Het: Mean obsered heterozygosity in this population.
Obs_Hom: Mean observed homozygosity in this population.
Exp_Het: Mean expected heterozygosity in this population.
Exp_Hom: Mean expected homozygosity in this population.
Pi: Mean value of an estimate of nucleotide diversity in this population.
Fis: Mean measure of the inbreeding coefficient of an individual (I) relative to the subpopulation (S) in this population.

## Sheet: LG05
# Variant positions
# Pop ID	Private	Num_Indv	Var	StdErr	P	Var	StdErr	Obs_Het	Var	StdErr	Obs_Hom	Var	StdErr	Exp_Het	Var	StdErr	Exp_Hom	Var	StdErr	Pi	Var	StdErr	Fis	Var	StdErr
10	10292	4.46291	12.442	0.01126	0.95158	0.01527	0.00039	0.04361	0.02486	0.0005	0.95639	0.02486	0.0005	0.06162	0.02073	0.00046	0.93838	0.02073	0.00046	0.07923	0.03941	0.00063	0.0739	0.06763	0.01126
13	10449	4.90041	16.2952	0.01292	0.95293	0.01514	0.00039	0.04377	0.02609	0.00052	0.95623	0.02609	0.00052	0.05942	0.02022	0.00046	0.94058	0.02022	0.00046	0.07717	0.03959	0.00064	0.07045	0.06462	0.01292
14	30540	11.1295	120.541	0.03165	0.92751	0.01952	0.0004	0.04263	0.02005	0.00041	0.95737	0.02005	0.00041	0.09544	0.02705	0.00047	0.90456	0.02705	0.00047	0.11453	0.04458	0.00061	0.18378	0.1418	0.03165
15	3996	1.79238	0.68105	0.00314	0.96553	0.01317	0.00044	0.04341	0.03155	0.00068	0.95659	0.03155	0.00068	0.04022	0.01622	0.00048	0.95978	0.01622	0.00048	0.05938	0.03895	0.00075	0.02578	0.02776	0.00314
16	18875	7.26291	43.95	0.01993	0.93759	0.01805	0.0004	0.04286	0.02156	0.00044	0.95714	0.02156	0.00044	0.08092	0.02481	0.00047	0.91908	0.02481	0.00047	0.09912	0.04248	0.00062	0.1303	0.10916	0.01993
17	3666	2.02614	1.26139	0.00441	0.96895	0.01211	0.00043	0.04702	0.03594	0.00074	0.95298	0.03594	0.00074	0.03595	0.01464	0.00048	0.96405	0.01464	0.00048	0.05458	0.03779	0.00076	0.0123	0.01852	0.00441
18	4298	1	0	0	0.96644	0.01565	0.00061	0.06712	0.06262	0.00123	0.93288	0.06262	0.00123	0.03356	0.01565	0.00061	0.96644	0.01565	0.00061	0.06712	0.06262	0.00123	0	0	0
30	2768	2.33677	2.047	0.00583	0.97037	0.01071	0.00042	0.03367	0.0224	0.00061	0.96633	0.0224	0.00061	0.03609	0.01397	0.00048	0.96391	0.01397	0.00048	0.04967	0.02968	0.0007	0.02832	0.02997	0.00583
37	7288	3.86218	8.82188	0.01016	0.96424	0.01198	0.00037	0.03157	0.0192	0.00047	0.96843	0.0192	0.00047	0.04501	0.01614	0.00043	0.95499	0.01614	0.00043	0.05826	0.03078	0.0006	0.05439	0.05237	0.01016
49	5600	2.72462	3.03966	0.00621	0.96676	0.01164	0.00038	0.03386	0.0211	0.00052	0.96614	0.0211	0.00052	0.04097	0.01542	0.00044	0.95903	0.01542	0.00044	0.05482	0.03088	0.00063	0.03784	0.03799	0.00621
9	14884	5.27504	20.4267	0.01391	0.9434	0.01775	0.00041	0.05296	0.03154	0.00055	0.94704	0.03154	0.00055	0.0713	0.02349	0.00047	0.9287	0.02349	0.00047	0.09309	0.04671	0.00067	0.08524	0.07702	0.01391
# All positions (variant and fixed)
# Pop ID	Private	Sites	Variant_Sites	Polymorphic_Sites	%Polymorphic_Loci	Num_Indv	Var	StdErr	P	Var	StdErr	Obs_Het	Var	StdErr	Obs_Hom	Var	StdErr	Exp_Het	Var	StdErr	Exp_Hom	Var	StdErr	Pi	Var	StdErr	Fis	Var	StdErr
10	10292	101165	98137	18012	17.8046	4.36488	12.4046	0.01107	0.95303	0.01488	0.00038	0.0423	0.02417	0.00049	0.9577	0.02417	0.00049	0.05978	0.02022	0.00045	0.94022	0.02022	0.00045	0.07686	0.03841	0.00062	0.07169	0.06576	0.01107
13	10449	100411	97662	17531	17.4592	4.80012	16.2395	0.01272	0.95422	0.01479	0.00038	0.04257	0.02542	0.0005	0.95743	0.02542	0.0005	0.05779	0.01976	0.00044	0.94221	0.01976	0.00044	0.07506	0.03867	0.00062	0.06852	0.06298	0.01272
14	30540	128591	120368	42116	32.7519	10.5069	118.75	0.03039	0.93214	0.01858	0.00038	0.03991	0.01887	0.00038	0.96009	0.01887	0.00038	0.08934	0.02587	0.00045	0.91066	0.02587	0.00045	0.10721	0.04251	0.00057	0.17203	0.13476	0.03039
15	3996	70616	69193	6524	9.2387	1.77794	0.67958	0.0031	0.96622	0.01293	0.00043	0.04254	0.03095	0.00066	0.95746	0.03095	0.00066	0.03941	0.01592	0.00047	0.96059	0.01592	0.00047	0.05819	0.03824	0.00074	0.02526	0.02721	0.0031
16	18875	115799	110663	29561	25.5279	6.99858	43.5915	0.0194	0.94036	0.01742	0.00039	0.04096	0.02069	0.00042	0.95904	0.02069	0.00042	0.07733	0.02399	0.00046	0.92267	0.02399	0.00046	0.09472	0.04101	0.0006	0.12452	0.10503	0.0194
17	3666	66032	64762	5527	8.37018	2.00851	1.25673	0.00436	0.96955	0.01189	0.00042	0.04612	0.03529	0.00073	0.95388	0.03529	0.00073	0.03526	0.01439	0.00047	0.96474	0.01439	0.00047	0.05353	0.03712	0.00075	0.01206	0.01817	0.00436
18	4298	42484	41403	2779	6.54129	1	0	0	0.96729	0.01528	0.0006	0.06541	0.06114	0.0012	0.93459	0.06114	0.0012	0.03271	0.01528	0.0006	0.96729	0.01528	0.0006	0.06541	0.06114	0.0012	0	0	0
30	2768	60978	60163	5550	9.10164	2.32085	2.04276	0.00579	0.97076	0.01058	0.00042	0.03322	0.02211	0.0006	0.96678	0.02211	0.0006	0.03561	0.0138	0.00048	0.96439	0.0138	0.00048	0.049	0.02932	0.00069	0.02794	0.02958	0.00579
37	7288	87591	85431	11100	12.6725	3.79661	8.79305	0.01002	0.96512	0.01171	0.00037	0.03079	0.01875	0.00046	0.96921	0.01875	0.00046	0.0439	0.0158	0.00042	0.9561	0.0158	0.00042	0.05682	0.0301	0.00059	0.05305	0.05115	0.01002
49	5600	80630	78803	8517	10.5631	2.6888	3.03327	0.00613	0.96752	0.0114	0.00038	0.03309	0.02065	0.00051	0.96691	0.02065	0.00051	0.04005	0.0151	0.00043	0.95995	0.0151	0.00043	0.05358	0.03025	0.00061	0.03698	0.03716	0.00613
9	14884	109811	105536	22741	20.7092	5.11676	20.2934	0.01359	0.9456	0.01718	0.0004	0.0509	0.03042	0.00053	0.9491	0.03042	0.00053	0.06852	0.02276	0.00046	0.93148	0.02276	0.00046	0.08947	0.04522	0.00064	0.08193	0.07429	0.01359
Num_Indv: Mean number of individuals per locus in this population.
Var: Variance
StdErr: Standard Error
P: Mean frequency of the most frequent allele at each locus in this population.
Obs_Het: Mean obsered heterozygosity in this population.
Obs_Hom: Mean observed homozygosity in this population.
Exp_Het: Mean expected heterozygosity in this population.
Exp_Hom: Mean expected homozygosity in this population.
Pi: Mean value of an estimate of nucleotide diversity in this population.
Fis: Mean measure of the inbreeding coefficient of an individual (I) relative to the subpopulation (S) in this population.

## Sheet: LG06
# Variant positions
# Pop ID	Private	Num_Indv	Var	StdErr	P	Var	StdErr	Obs_Het	Var	StdErr	Obs_Hom	Var	StdErr	Exp_Het	Var	StdErr	Exp_Hom	Var	StdErr	Pi	Var	StdErr	Fis	Var	StdErr
10	10292	4.46291	12.442	0.01126	0.95158	0.01527	0.00039	0.04361	0.02486	0.0005	0.95639	0.02486	0.0005	0.06162	0.02073	0.00046	0.93838	0.02073	0.00046	0.07923	0.03941	0.00063	0.0739	0.06763	0.01126
13	10449	4.90041	16.2952	0.01292	0.95293	0.01514	0.00039	0.04377	0.02609	0.00052	0.95623	0.02609	0.00052	0.05942	0.02022	0.00046	0.94058	0.02022	0.00046	0.07717	0.03959	0.00064	0.07045	0.06462	0.01292
14	30540	11.1295	120.541	0.03165	0.92751	0.01952	0.0004	0.04263	0.02005	0.00041	0.95737	0.02005	0.00041	0.09544	0.02705	0.00047	0.90456	0.02705	0.00047	0.11453	0.04458	0.00061	0.18378	0.1418	0.03165
15	3996	1.79238	0.68105	0.00314	0.96553	0.01317	0.00044	0.04341	0.03155	0.00068	0.95659	0.03155	0.00068	0.04022	0.01622	0.00048	0.95978	0.01622	0.00048	0.05938	0.03895	0.00075	0.02578	0.02776	0.00314
16	18875	7.26291	43.95	0.01993	0.93759	0.01805	0.0004	0.04286	0.02156	0.00044	0.95714	0.02156	0.00044	0.08092	0.02481	0.00047	0.91908	0.02481	0.00047	0.09912	0.04248	0.00062	0.1303	0.10916	0.01993
17	3666	2.02614	1.26139	0.00441	0.96895	0.01211	0.00043	0.04702	0.03594	0.00074	0.95298	0.03594	0.00074	0.03595	0.01464	0.00048	0.96405	0.01464	0.00048	0.05458	0.03779	0.00076	0.0123	0.01852	0.00441
18	4298	1	0	0	0.96644	0.01565	0.00061	0.06712	0.06262	0.00123	0.93288	0.06262	0.00123	0.03356	0.01565	0.00061	0.96644	0.01565	0.00061	0.06712	0.06262	0.00123	0	0	0
30	2768	2.33677	2.047	0.00583	0.97037	0.01071	0.00042	0.03367	0.0224	0.00061	0.96633	0.0224	0.00061	0.03609	0.01397	0.00048	0.96391	0.01397	0.00048	0.04967	0.02968	0.0007	0.02832	0.02997	0.00583
37	7288	3.86218	8.82188	0.01016	0.96424	0.01198	0.00037	0.03157	0.0192	0.00047	0.96843	0.0192	0.00047	0.04501	0.01614	0.00043	0.95499	0.01614	0.00043	0.05826	0.03078	0.0006	0.05439	0.05237	0.01016
49	5600	2.72462	3.03966	0.00621	0.96676	0.01164	0.00038	0.03386	0.0211	0.00052	0.96614	0.0211	0.00052	0.04097	0.01542	0.00044	0.95903	0.01542	0.00044	0.05482	0.03088	0.00063	0.03784	0.03799	0.00621
9	14884	5.27504	20.4267	0.01391	0.9434	0.01775	0.00041	0.05296	0.03154	0.00055	0.94704	0.03154	0.00055	0.0713	0.02349	0.00047	0.9287	0.02349	0.00047	0.09309	0.04671	0.00067	0.08524	0.07702	0.01391
# All positions (variant and fixed)
# Pop ID	Private	Sites	Variant_Sites	Polymorphic_Sites	%Polymorphic_Loci	Num_Indv	Var	StdErr	P	Var	StdErr	Obs_Het	Var	StdErr	Obs_Hom	Var	StdErr	Exp_Het	Var	StdErr	Exp_Hom	Var	StdErr	Pi	Var	StdErr	Fis	Var	StdErr
10	10292	101165	98137	18012	17.8046	4.36488	12.4046	0.01107	0.95303	0.01488	0.00038	0.0423	0.02417	0.00049	0.9577	0.02417	0.00049	0.05978	0.02022	0.00045	0.94022	0.02022	0.00045	0.07686	0.03841	0.00062	0.07169	0.06576	0.01107
13	10449	100411	97662	17531	17.4592	4.80012	16.2395	0.01272	0.95422	0.01479	0.00038	0.04257	0.02542	0.0005	0.95743	0.02542	0.0005	0.05779	0.01976	0.00044	0.94221	0.01976	0.00044	0.07506	0.03867	0.00062	0.06852	0.06298	0.01272
14	30540	128591	120368	42116	32.7519	10.5069	118.75	0.03039	0.93214	0.01858	0.00038	0.03991	0.01887	0.00038	0.96009	0.01887	0.00038	0.08934	0.02587	0.00045	0.91066	0.02587	0.00045	0.10721	0.04251	0.00057	0.17203	0.13476	0.03039
15	3996	70616	69193	6524	9.2387	1.77794	0.67958	0.0031	0.96622	0.01293	0.00043	0.04254	0.03095	0.00066	0.95746	0.03095	0.00066	0.03941	0.01592	0.00047	0.96059	0.01592	0.00047	0.05819	0.03824	0.00074	0.02526	0.02721	0.0031
16	18875	115799	110663	29561	25.5279	6.99858	43.5915	0.0194	0.94036	0.01742	0.00039	0.04096	0.02069	0.00042	0.95904	0.02069	0.00042	0.07733	0.02399	0.00046	0.92267	0.02399	0.00046	0.09472	0.04101	0.0006	0.12452	0.10503	0.0194
17	3666	66032	64762	5527	8.37018	2.00851	1.25673	0.00436	0.96955	0.01189	0.00042	0.04612	0.03529	0.00073	0.95388	0.03529	0.00073	0.03526	0.01439	0.00047	0.96474	0.01439	0.00047	0.05353	0.03712	0.00075	0.01206	0.01817	0.00436
18	4298	42484	41403	2779	6.54129	1	0	0	0.96729	0.01528	0.0006	0.06541	0.06114	0.0012	0.93459	0.06114	0.0012	0.03271	0.01528	0.0006	0.96729	0.01528	0.0006	0.06541	0.06114	0.0012	0	0	0
30	2768	60978	60163	5550	9.10164	2.32085	2.04276	0.00579	0.97076	0.01058	0.00042	0.03322	0.02211	0.0006	0.96678	0.02211	0.0006	0.03561	0.0138	0.00048	0.96439	0.0138	0.00048	0.049	0.02932	0.00069	0.02794	0.02958	0.00579
37	7288	87591	85431	11100	12.6725	3.79661	8.79305	0.01002	0.96512	0.01171	0.00037	0.03079	0.01875	0.00046	0.96921	0.01875	0.00046	0.0439	0.0158	0.00042	0.9561	0.0158	0.00042	0.05682	0.0301	0.00059	0.05305	0.05115	0.01002
49	5600	80630	78803	8517	10.5631	2.6888	3.03327	0.00613	0.96752	0.0114	0.00038	0.03309	0.02065	0.00051	0.96691	0.02065	0.00051	0.04005	0.0151	0.00043	0.95995	0.0151	0.00043	0.05358	0.03025	0.00061	0.03698	0.03716	0.00613
9	14884	109811	105536	22741	20.7092	5.11676	20.2934	0.01359	0.9456	0.01718	0.0004	0.0509	0.03042	0.00053	0.9491	0.03042	0.00053	0.06852	0.02276	0.00046	0.93148	0.02276	0.00046	0.08947	0.04522	0.00064	0.08193	0.07429	0.01359
Num_Indv: Mean number of individuals per locus in this population.
Var: Variance
StdErr: Standard Error
P: Mean frequency of the most frequent allele at each locus in this population.
Obs_Het: Mean obsered heterozygosity in this population.
Obs_Hom: Mean observed homozygosity in this population.
Exp_Het: Mean expected heterozygosity in this population.
Exp_Hom: Mean expected homozygosity in this population.
Pi: Mean value of an estimate of nucleotide diversity in this population.
Fis: Mean measure of the inbreeding coefficient of an individual (I) relative to the subpopulation (S) in this population.

## Sheet: LG07
# Variant positions
# Pop ID	Private	Num_Indv	Var	StdErr	P	Var	StdErr	Obs_Het	Var	StdErr	Obs_Hom	Var	StdErr	Exp_Het	Var	StdErr	Exp_Hom	Var	StdErr	Pi	Var	StdErr	Fis	Var	StdErr
10	9716	4.44371	12.3507	0.01138	0.95149	0.01532	0.0004	0.04176	0.02384	0.0005	0.95824	0.02384	0.0005	0.06166	0.02082	0.00047	0.93834	0.02082	0.00047	0.07897	0.03914	0.00064	0.07751	0.06995	0.01138
13	9862	4.80688	15.9543	0.01294	0.95206	0.01523	0.0004	0.04356	0.02561	0.00052	0.95644	0.02561	0.00052	0.06082	0.02058	0.00046	0.93918	0.02058	0.00046	0.07834	0.03946	0.00064	0.074	0.06783	0.01294
14	31298	11.0218	117.765	0.03169	0.92405	0.0201	0.00041	0.04285	0.02006	0.00041	0.95715	0.02006	0.00041	0.10017	0.02768	0.00049	0.89983	0.02768	0.00049	0.12007	0.04572	0.00062	0.19862	0.1506	0.03169
15	4081	1.77546	0.67031	0.00314	0.96457	0.01363	0.00045	0.04499	0.03324	0.0007	0.95501	0.03324	0.0007	0.04109	0.01665	0.0005	0.95891	0.01665	0.0005	0.06116	0.04063	0.00077	0.02609	0.02826	0.00314
16	17613	7.1802	43.2328	0.02006	0.93883	0.01778	0.00041	0.04076	0.02047	0.00044	0.95924	0.02047	0.00044	0.07929	0.02452	0.00048	0.92071	0.02452	0.00048	0.09692	0.04167	0.00062	0.12975	0.10859	0.02006
17	3551	2.0421	1.28334	0.00454	0.97108	0.01111	0.00042	0.04368	0.03265	0.00072	0.95632	0.03265	0.00072	0.03394	0.01366	0.00047	0.96606	0.01366	0.00047	0.05113	0.03494	0.00075	0.01219	0.01705	0.00454
18	3208	1	0	0	0.96222	0.01746	0.00064	0.07555	0.06985	0.00128	0.92445	0.06985	0.00128	0.03778	0.01746	0.00064	0.96222	0.01746	0.00064	0.07555	0.06985	0.00128	0	0	0
30	2687	2.2887	1.99465	0.00585	0.97156	0.01031	0.00042	0.02911	0.01896	0.00057	0.97089	0.01896	0.00057	0.03465	0.01348	0.00048	0.96535	0.01348	0.00048	0.04688	0.02743	0.00069	0.03115	0.03237	0.00585
37	7013	3.86636	8.75718	0.01021	0.96315	0.01236	0.00038	0.0336	0.01994	0.00049	0.9664	0.01994	0.00049	0.04627	0.0166	0.00044	0.95373	0.0166	0.00044	0.05966	0.03121	0.00061	0.05212	0.05112	0.01021
49	5525	2.72063	3.01825	0.00625	0.96531	0.01224	0.0004	0.03477	0.02229	0.00054	0.96523	0.02229	0.00054	0.04249	0.01607	0.00046	0.95751	0.01607	0.00046	0.05709	0.03249	0.00065	0.04049	0.04074	0.00625
9	14426	5.26202	20.4266	0.01414	0.94207	0.01792	0.00042	0.05211	0.03008	0.00054	0.94789	0.03008	0.00054	0.07332	0.02387	0.00048	0.92668	0.02387	0.00048	0.09484	0.04648	0.00067	0.0904	0.08059	0.01414
# All positions (variant and fixed)
# Pop ID	Private	Sites	Variant_Sites	Polymorphic_Sites	%Polymorphic_Loci	Num_Indv	Var	StdErr	P	Var	StdErr	Obs_Het	Var	StdErr	Obs_Hom	Var	StdErr	Exp_Het	Var	StdErr	Exp_Hom	Var	StdErr	Pi	Var	StdErr	Fis	Var	StdErr
10	9716	98173	95350	17412	17.736	4.34865	12.3135	0.0112	0.95289	0.01495	0.00039	0.04056	0.0232	0.00049	0.95944	0.0232	0.00049	0.05989	0.02033	0.00046	0.94011	0.02033	0.00046	0.0767	0.03819	0.00062	0.07528	0.06811	0.0112
13	9862	97909	95243	17334	17.7042	4.70748	15.889	0.01274	0.95337	0.01488	0.00039	0.04237	0.02497	0.0005	0.95763	0.02497	0.0005	0.05916	0.02012	0.00045	0.94084	0.02012	0.00045	0.07621	0.03855	0.00063	0.07199	0.06613	0.01274
14	31298	125582	117257	43068	34.2947	10.3761	115.971	0.03039	0.92908	0.01913	0.00039	0.04	0.01884	0.00039	0.96	0.01884	0.00039	0.09353	0.02646	0.00046	0.90647	0.02646	0.00046	0.11211	0.04359	0.00059	0.18546	0.14306	0.03039
15	4081	69074	67846	6485	9.38848	1.76263	0.66863	0.00311	0.9652	0.01341	0.00044	0.04419	0.03269	0.00069	0.95581	0.03269	0.00069	0.04036	0.01638	0.00049	0.95964	0.01638	0.00049	0.06007	0.03997	0.00076	0.02562	0.02777	0.00311
16	17613	112615	107484	27915	24.788	6.90864	42.8567	0.01951	0.94162	0.01714	0.00039	0.03891	0.01961	0.00042	0.96109	0.01961	0.00042	0.07568	0.02367	0.00046	0.92432	0.02367	0.00046	0.0925	0.04018	0.0006	0.12384	0.10437	0.01951
17	3551	63267	62131	5131	8.11007	2.02458	1.27855	0.0045	0.9716	0.01092	0.00042	0.04289	0.0321	0.00071	0.95711	0.0321	0.00071	0.03334	0.01344	0.00046	0.96666	0.01344	0.00046	0.05022	0.03435	0.00074	0.01197	0.01675	0.0045
18	3208	43213	42408	3204	7.41444	1	0	0	0.96293	0.01716	0.00063	0.07414	0.06865	0.00126	0.92586	0.06865	0.00126	0.03707	0.01716	0.00063	0.96293	0.01716	0.00063	0.07414	0.06865	0.00126	0	0	0
30	2687	58948	58223	5158	8.75008	2.2737	1.98972	0.00581	0.97191	0.01019	0.00042	0.02876	0.01874	0.00056	0.97124	0.01874	0.00056	0.03423	0.01333	0.00048	0.96577	0.01333	0.00048	0.04631	0.02712	0.00068	0.03077	0.03198	0.00581
37	7013	85924	83955	11136	12.9603	3.8044	8.73058	0.01008	0.964	0.0121	0.00038	0.03283	0.01951	0.00048	0.96717	0.01951	0.00048	0.04521	0.01627	0.00044	0.95479	0.01627	0.00044	0.05829	0.03057	0.0006	0.05093	0.05001	0.01008
49	5525	78761	77237	8537	10.8391	2.68886	3.01327	0.00619	0.96599	0.01202	0.00039	0.03409	0.02188	0.00053	0.96591	0.02188	0.00053	0.04167	0.0158	0.00045	0.95833	0.0158	0.00045	0.05598	0.03192	0.00064	0.03971	0.03998	0.00619
9	14426	106239	102231	22759	21.4225	5.10752	20.2873	0.01382	0.94426	0.01736	0.0004	0.05015	0.02905	0.00052	0.94985	0.02905	0.00052	0.07055	0.02316	0.00047	0.92945	0.02316	0.00047	0.09127	0.04505	0.00065	0.08699	0.07784	0.01382
Num_Indv: Mean number of individuals per locus in this population.
Var: Variance
StdErr: Standard Error
P: Mean frequency of the most frequent allele at each locus in this population.
Obs_Het: Mean obsered heterozygosity in this population.
Obs_Hom: Mean observed homozygosity in this population.
Exp_Het: Mean expected heterozygosity in this population.
Exp_Hom: Mean expected homozygosity in this population.
Pi: Mean value of an estimate of nucleotide diversity in this population.
Fis: Mean measure of the inbreeding coefficient of an individual (I) relative to the subpopulation (S) in this population.
